# Supplementary material for: Single cell transcriptional signatures of the human placenta in term and preterm parturition
Source: eLife. 2019 Dec 12;8:e52004. doi: 10.7554/eLife.52004 (PMC6949028; doi:10.7554/eLife.52004)
Supplement: Supplementary file 2. — Each row summarizes the total number of cells of each cell-type as determined by Seurat and split by pregnancy condition (TNL = term no labor, TIL = term in labor, PTL = preterm labor), or location of the tissue (BP = basal plate, PV = Placental Villi, CAM = chorioamniotic membranes). [file elife-52004-supp2.xlsx]

## Sheet: TableS2
Cluster name	Total	Condition			Tissue
		TNL	TIL	PTL	BP	PV	CAM
B-cells	1176	435	265	476	450	408	318
npiCTB	2405	888	282	1235	660	1740	5
CTB	11743	4139	1310	6294	3489	8127	127
Decidual	2757	628	1251	878	1406	11	1340
Macrophage-1	3761	842	1281	1638	1633	376	1752
Macrophage-2	2340	875	1091	374	1109	1221	10
Endometrial	221	34	133	54	20	0	201
LED	6344	2124	1154	3066	122	3	6219
EVT	7711	2842	1904	2965	2947	1676	3088
Fibroblast	669	120	240	309	405	129	135
HSC	509	99	169	241	206	63	240
Monocyte	2668	258	1114	1296	1236	979	453
Stromal-3	636	0	585	51	0	0	636
NK-cells	8124	2413	2027	3684	3746	935	3443
Stromal-1	1764	443	710	611	36	3	1725
Stromal-2	2474	1514	650	310	1129	1344	1
STB	174	95	22	57	36	134	4
T-cell-activated	9306	2795	4493	2018	7303	1191	812
T-cell-resting	13124	2951	4534	5639	2802	910	9412
