# Supplementary material for: Single cell transcriptional signatures of the human placenta in term and preterm parturition
Source: eLife. 2019 Dec 12;8:e52004. doi: 10.7554/eLife.52004 (PMC6949028; doi:10.7554/eLife.52004)
Supplement: Supplementary file 5. — The columns represent: 1) Cluster or cell-type name, 2) Comparison groups or contrast (i.e., TNL vs TIL, TIL vs PTL), 3) Ensembl gene identifier, 4) Gene symbol, 5) baseMean gene baseline expression as calculated by DESeq2, 6) log2 Fold Change of the first group in column two versus the second group, 7) Standard error estimated for the log2 Fold Change, 8) Nominal p-value, 9) q-value or adjusted p-value to control for FDR. Only rows with q < 0. two are reported. [file elife-52004-supp5.xls]

## Sheet: TableS5
Cluster	Compare	ENSG	Gene	baseMean	log2FoldChange	lfcSE	stat	pvalue	padj
npiCTB	TNL_v_TIL	ENSG00000142089	IFITM3	48.5519	-1.3916	0.337412	-4.12435	3.71783e-05	0.138712
npiCTB	TNL_v_TIL	ENSG00000251562	MALAT1	338.201	-1.93855	0.381288	-5.08423	3.69129e-07	0.00275444
CTB	TNL_v_TIL	ENSG00000187608	ISG15	448.942	-0.998173	0.26323	-3.79203	0.000149424	0.088373
CTB	TNL_v_TIL	ENSG00000117594	HSD11B1	42.4303	-4.33235	0.907588	-4.77348	1.8107e-06	0.00631346
CTB	TNL_v_TIL	ENSG00000115602	IL1RL1	65.1784	-3.94468	0.835245	-4.72277	2.32649e-06	0.00648951
CTB	TNL_v_TIL	ENSG00000125538	IL1B	37.0113	-1.49655	0.388518	-3.85194	0.000117184	0.0778271
CTB	TNL_v_TIL	ENSG00000144381	HSPD1	5201.95	-0.603985	0.15989	-3.7775	0.000158409	0.088373
CTB	TNL_v_TIL	ENSG00000115461	IGFBP5	49.4868	-2.69946	0.667665	-4.04314	5.27397e-05	0.0498181
CTB	TNL_v_TIL	ENSG00000011198	ABHD5	307.673	-0.837004	0.225673	-3.70893	0.000208137	0.0985744
CTB	TNL_v_TIL	ENSG00000160801	PTH1R	11.9482	-3.0934	0.885358	-3.49395	0.000475932	0.165946
CTB	TNL_v_TIL	ENSG00000273125	RP11-115H18.1	374.461	1.90758	0.409945	4.65326	3.26731e-06	0.00759487
CTB	TNL_v_TIL	ENSG00000170893	TRH	5.65019	-6.80858	1.8209	-3.73913	0.000184661	0.0953877
CTB	TNL_v_TIL	ENSG00000114115	RBP1	107.822	-2.46444	0.674646	-3.65293	0.000259262	0.110711
CTB	TNL_v_TIL	ENSG00000153002	CPB1	8.86919	-6.07407	1.67463	-3.62712	0.000286604	0.114208
CTB	TNL_v_TIL	ENSG00000174808	BTC	19.4966	2.92561	0.791582	3.69591	0.000219101	0.0985744
CTB	TNL_v_TIL	ENSG00000111879	FAM184A	604.589	-1.0083	0.286784	-3.51588	0.000438297	0.156742
CTB	TNL_v_TIL	ENSG00000112096	SOD2	437.286	-0.949371	0.241838	-3.92565	8.64974e-05	0.0670211
CTB	TNL_v_TIL	ENSG00000146678	IGFBP1	325.356	-3.32333	0.834638	-3.98177	6.84053e-05	0.0561205
CTB	TNL_v_TIL	ENSG00000128510	CPA4	108.551	1.48929	0.369121	4.0347	5.46721e-05	0.0498181
CTB	TNL_v_TIL	ENSG00000107968	MAP3K8	332.344	-1.37967	0.386294	-3.57155	0.000354874	0.130248
CTB	TNL_v_TIL	ENSG00000107984	DKK1	127.497	-2.72608	0.712237	-3.82749	0.000129457	0.0820699
CTB	TNL_v_TIL	ENSG00000072401	UBE2D1	613.425	-0.719707	0.173566	-4.14659	3.37464e-05	0.0392217
CTB	TNL_v_TIL	ENSG00000183346	C10orf107	32.8741	-3.47902	1.01056	-3.44267	0.000575999	0.186825
CTB	TNL_v_TIL	ENSG00000107902	LHPP	395.55	0.802394	0.223802	3.58529	0.000336701	0.129495
CTB	TNL_v_TIL	ENSG00000130598	TNNI2	85.9011	-2.36326	0.335367	-7.04681	1.83065e-12	2.55321e-08
CTB	TNL_v_TIL	ENSG00000251381	LINC00958	94.0763	-2.57367	0.568935	-4.52367	6.07772e-06	0.0121094
CTB	TNL_v_TIL	ENSG00000187479	C11orf96	103.156	-2.42759	0.625033	-3.88394	0.000102778	0.073351
CTB	TNL_v_TIL	ENSG00000174807	CD248	52.6382	-3.11554	0.728333	-4.27764	1.88885e-05	0.0267555
CTB	TNL_v_TIL	ENSG00000174080	CTSF	723.308	0.766302	0.188567	4.06382	4.82769e-05	0.0498181
CTB	TNL_v_TIL	ENSG00000069482	GAL	25.5206	-2.92096	0.800202	-3.65028	0.000261953	0.110711
CTB	TNL_v_TIL	ENSG00000109846	CRYAB	398.434	-1.81064	0.466862	-3.87831	0.000105185	0.073351
CTB	TNL_v_TIL	ENSG00000118971	CCND2	132.305	-2.9292	0.594271	-4.92906	8.26274e-07	0.00384135
CTB	TNL_v_TIL	ENSG00000134531	EMP1	27.148	-2.2573	0.536298	-4.20905	2.56452e-05	0.0325158
CTB	TNL_v_TIL	ENSG00000167767	KRT80	380.7	1.25897	0.362405	3.47393	0.000512892	0.170317
CTB	TNL_v_TIL	ENSG00000205420	KRT6A	19.8531	-3.56554	0.953005	-3.74136	0.000183028	0.0953877
CTB	TNL_v_TIL	ENSG00000102760	RGCC	436.356	-2.17336	0.432038	-5.03048	4.89257e-07	0.00341183
CTB	TNL_v_TIL	ENSG00000261105	RP11-173B14.5	149.947	1.37906	0.370426	3.72292	0.000196932	0.098093
CTB	TNL_v_TIL	ENSG00000165949	IFI27	132.818	-1.97933	0.522971	-3.78478	0.000153847	0.088373
CTB	TNL_v_TIL	ENSG00000215252	GOLGA8B	171.458	1.61312	0.377411	4.27419	1.91837e-05	0.0267555
CTB	TNL_v_TIL	ENSG00000140545	MFGE8	88.0729	-1.09421	0.305643	-3.58004	0.000343538	0.129495
CTB	TNL_v_TIL	ENSG00000141753	IGFBP4	100.571	-2.65348	0.659369	-4.02427	5.71513e-05	0.0498181
CTB	TNL_v_TIL	ENSG00000101460	MAP1LC3A	290.147	-0.856667	0.235552	-3.63685	0.000275992	0.113213
CTB	TNL_v_TIL	ENSG00000006016	CRLF1	14.8868	-2.77533	0.809452	-3.42865	0.000606591	0.192276
CTB	TNL_v_TIL	ENSG00000196109	ZNF676	11.2527	-4.5603	1.03237	-4.4173	9.9943e-06	0.0174238
CTB	TNL_v_TIL	ENSG00000004776	HSPB6	28.9983	-2.58186	0.740373	-3.48724	0.000488035	0.166015
CTB	TNL_v_TIL	ENSG00000198832	SELM	345.382	-1.22582	0.331621	-3.69644	0.000218645	0.0985744
Decidual	TNL_v_TIL	ENSG00000169641	LUZP1	216.591	-0.990525	0.22964	-4.31338	1.60781e-05	0.0882149
Decidual	TNL_v_TIL	ENSG00000142856	ITGB3BP	133.944	1.15597	0.25086	4.60803	4.06505e-06	0.0334553
Decidual	TNL_v_TIL	ENSG00000169271	HSPB3	14.007	-5.08613	1.05572	-4.81771	1.45214e-06	0.0239022
Macrophage-1	TNL_v_TIL	ENSG00000074800	ENO1	534.286	0.660247	0.252423	2.61564	0.00890604	0.192822
Macrophage-1	TNL_v_TIL	ENSG00000116649	SRM	69.3487	0.928574	0.357432	2.5979	0.00937947	0.196527
Macrophage-1	TNL_v_TIL	ENSG00000028137	TNFRSF1B	113.34	-0.879474	0.275316	-3.19441	0.00140115	0.0645201
Macrophage-1	TNL_v_TIL	ENSG00000158747	NBL1	36.5536	-1.74834	0.446933	-3.91187	9.15837e-05	0.014974
Macrophage-1	TNL_v_TIL	ENSG00000117215	PLA2G2D	25.4733	-2.06563	0.637078	-3.24236	0.00118544	0.0586752
Macrophage-1	TNL_v_TIL	ENSG00000173372	C1QA	5190.78	-1.11476	0.218639	-5.09865	3.42085e-07	0.000425707
Macrophage-1	TNL_v_TIL	ENSG00000159189	C1QC	2800.98	-0.830463	0.249015	-3.33499	0.000853028	0.0496033
Macrophage-1	TNL_v_TIL	ENSG00000173369	C1QB	4520.02	-0.903413	0.221306	-4.08219	4.46136e-05	0.00959192
Macrophage-1	TNL_v_TIL	ENSG00000020633	RUNX3	63.6026	-1.08295	0.356225	-3.04006	0.0023653	0.0919393
Macrophage-1	TNL_v_TIL	ENSG00000131236	CAP1	241.103	0.654488	0.249197	2.62638	0.00862978	0.192769
Macrophage-1	TNL_v_TIL	ENSG00000084070	SMAP2	76.7027	-1.04957	0.318529	-3.29506	0.000984018	0.052481
Macrophage-1	TNL_v_TIL	ENSG00000184588	PDE4B	110.173	-1.27252	0.302286	-4.20965	2.55769e-05	0.00595532
Macrophage-1	TNL_v_TIL	ENSG00000162636	FAM102B	40.3153	-1.16941	0.442235	-2.64433	0.00818536	0.190428
Macrophage-1	TNL_v_TIL	ENSG00000134202	GSTM3	22.5855	-1.80726	0.555696	-3.25225	0.00114496	0.0574989
Macrophage-1	TNL_v_TIL	ENSG00000116824	CD2	33.2462	-2.14416	0.560858	-3.82301	0.000131833	0.0178698
Macrophage-1	TNL_v_TIL	ENSG00000178104	PDE4DIP	219.138	-0.756777	0.266743	-2.83711	0.00455246	0.137372
Macrophage-1	TNL_v_TIL	ENSG00000213240	NOTCH2NL	122.727	-1.49882	0.330147	-4.53985	5.62933e-06	0.00288588
Macrophage-1	TNL_v_TIL	ENSG00000163386	NBPF10	75.4846	-1.04046	0.293054	-3.55039	0.000384662	0.030773
Macrophage-1	TNL_v_TIL	ENSG00000183558	HIST2H2AA3	84.6588	-1.12591	0.434607	-2.59064	0.00957965	0.196889
Macrophage-1	TNL_v_TIL	ENSG00000143384	MCL1	716.782	-0.572617	0.218473	-2.62099	0.00876749	0.192822
Macrophage-1	TNL_v_TIL	ENSG00000163131	CTSS	685.789	-0.744995	0.235656	-3.16137	0.00157031	0.0688134
Macrophage-1	TNL_v_TIL	ENSG00000160712	IL6R	46.1518	-1.09282	0.366806	-2.9793	0.00288906	0.0999959
Macrophage-1	TNL_v_TIL	ENSG00000160789	LMNA	1127.24	-1.1135	0.274734	-4.05302	5.05601e-05	0.0096626
Macrophage-1	TNL_v_TIL	ENSG00000196189	SEMA4A	64.1568	-1.34206	0.422683	-3.17509	0.00149791	0.0670871
Macrophage-1	TNL_v_TIL	ENSG00000116604	MEF2D	43.0216	-1.03883	0.374211	-2.77607	0.00550207	0.151644
Macrophage-1	TNL_v_TIL	ENSG00000117036	ETV3	67.5934	-0.90171	0.348663	-2.58619	0.00970424	0.198036
Macrophage-1	TNL_v_TIL	ENSG00000143226	FCGR2A	416.153	-0.724564	0.252238	-2.87255	0.00407178	0.127336
Macrophage-1	TNL_v_TIL	ENSG00000173110	HSPA6	1693.04	1.45456	0.286153	5.08313	3.71256e-07	0.000425707
Macrophage-1	TNL_v_TIL	ENSG00000072694	FCGR2B	123.571	-1.28647	0.365546	-3.5193	0.000432689	0.0329114
Macrophage-1	TNL_v_TIL	ENSG00000143198	MGST3	427.29	0.778578	0.241217	3.22771	0.00124784	0.0608876
Macrophage-1	TNL_v_TIL	ENSG00000143322	ABL2	353.324	-0.763104	0.252237	-3.02534	0.00248351	0.0944071
Macrophage-1	TNL_v_TIL	ENSG00000116701	NCF2	101.619	0.861947	0.329412	2.61663	0.00888038	0.192822
Macrophage-1	TNL_v_TIL	ENSG00000162704	ARPC5	414.126	0.683321	0.226389	3.01835	0.00254158	0.0944071
Macrophage-1	TNL_v_TIL	ENSG00000198860	TSEN15	22.8271	1.34561	0.47973	2.80493	0.00503278	0.145485
Macrophage-1	TNL_v_TIL	ENSG00000116679	IVNS1ABP	122.715	-1.02984	0.305722	-3.36854	0.00075568	0.0478369
Macrophage-1	TNL_v_TIL	ENSG00000162889	MAPKAPK2	105.958	-1.21632	0.322749	-3.76863	0.000164146	0.0205331
Macrophage-1	TNL_v_TIL	ENSG00000196352	CD55	235.836	-1.16336	0.286939	-4.05439	5.02653e-05	0.0096626
Macrophage-1	TNL_v_TIL	ENSG00000170385	SLC30A1	53.7981	1.34585	0.359116	3.74766	0.00017849	0.0214854
Macrophage-1	TNL_v_TIL	ENSG00000054267	ARID4B	105.328	-0.77031	0.297773	-2.5869	0.0096843	0.198036
Macrophage-1	TNL_v_TIL	ENSG00000162852	CNST	16.2994	-1.34737	0.519596	-2.59311	0.00951133	0.196889
Macrophage-1	TNL_v_TIL	ENSG00000235576	AC092580.4	22.8629	-1.95696	0.581463	-3.36557	0.000763851	0.0478369
Macrophage-1	TNL_v_TIL	ENSG00000171848	RRM2	13.0287	2.23201	0.662248	3.37036	0.0007507	0.0478369
Macrophage-1	TNL_v_TIL	ENSG00000197872	FAM49A	85.742	-1.17574	0.319275	-3.68252	0.000230939	0.0238505
Macrophage-1	TNL_v_TIL	ENSG00000075426	FOSL2	180.836	-0.843535	0.323807	-2.60505	0.00918596	0.195333
Macrophage-1	TNL_v_TIL	ENSG00000119801	YPEL5	270.391	-0.81709	0.262833	-3.10878	0.00187862	0.0783326
Macrophage-1	TNL_v_TIL	ENSG00000162924	REL	400.003	-0.583142	0.215664	-2.70394	0.00685228	0.179938
Macrophage-1	TNL_v_TIL	ENSG00000197329	PELI1	173.731	-0.958382	0.335242	-2.85877	0.00425283	0.130623
Macrophage-1	TNL_v_TIL	ENSG00000115514	TXNDC9	32.7208	1.18826	0.382175	3.10921	0.0018759	0.0783326
Macrophage-1	TNL_v_TIL	ENSG00000153201	RANBP2	85.4233	-1.00842	0.324768	-3.10504	0.0019025	0.0785042
Macrophage-1	TNL_v_TIL	ENSG00000115008	IL1A	26.3683	-1.24941	0.46123	-2.70887	0.0067513	0.177965
Macrophage-1	TNL_v_TIL	ENSG00000169554	ZEB2	214.442	-0.756393	0.271051	-2.79059	0.00526116	0.149425
Macrophage-1	TNL_v_TIL	ENSG00000153234	NR4A2	531.484	-0.743172	0.275314	-2.69936	0.0069473	0.18002
Macrophage-1	TNL_v_TIL	ENSG00000115844	DLX2	15.4329	1.59235	0.54223	2.93667	0.00331761	0.109211
Macrophage-1	TNL_v_TIL	ENSG00000154518	ATP5G3	408.939	0.909764	0.254049	3.58106	0.000342197	0.0294289
Macrophage-1	TNL_v_TIL	ENSG00000116044	NFE2L2	209.082	-0.619982	0.238072	-2.60418	0.00920953	0.195333
Macrophage-1	TNL_v_TIL	ENSG00000003436	TFPI	42.9671	-1.59762	0.409929	-3.8973	9.72721e-05	0.0152098
Macrophage-1	TNL_v_TIL	ENSG00000168542	COL3A1	35.6932	-1.75617	0.550039	-3.19281	0.00140896	0.0645201
Macrophage-1	TNL_v_TIL	ENSG00000138378	STAT4	18.6596	-1.47303	0.559452	-2.63299	0.00846357	0.191544
Macrophage-1	TNL_v_TIL	ENSG00000081320	STK17B	121.671	-0.869024	0.31158	-2.78909	0.00528569	0.149425
Macrophage-1	TNL_v_TIL	ENSG00000013441	CLK1	335.437	-0.671059	0.249907	-2.68523	0.00724796	0.181993
Macrophage-1	TNL_v_TIL	ENSG00000003402	CFLAR	305.433	-1.05361	0.250489	-4.20622	2.5968e-05	0.00595532
Macrophage-1	TNL_v_TIL	ENSG00000115457	IGFBP2	42.2056	-1.27701	0.485476	-2.63044	0.00852754	0.192254
Macrophage-1	TNL_v_TIL	ENSG00000163466	ARPC2	740.938	0.565571	0.213449	2.64968	0.0080569	0.190428
Macrophage-1	TNL_v_TIL	ENSG00000188042	ARL4C	276.755	-1.30029	0.296947	-4.37887	1.19297e-05	0.0039084
Macrophage-1	TNL_v_TIL	ENSG00000124831	LRRFIP1	298.346	-0.731402	0.242433	-3.01692	0.00255358	0.0944071
Macrophage-1	TNL_v_TIL	ENSG00000168393	DTYMK	32.8436	1.26762	0.420217	3.01659	0.00255638	0.0944071
Macrophage-1	TNL_v_TIL	ENSG00000134107	BHLHE40	323.995	-0.654396	0.247501	-2.64402	0.00819283	0.190428
Macrophage-1	TNL_v_TIL	ENSG00000134072	CAMK1	49.153	1.26276	0.370657	3.40681	0.000657277	0.0434814
Macrophage-1	TNL_v_TIL	ENSG00000134070	IRAK2	32.8421	-1.03736	0.390625	-2.65563	0.00791599	0.190428
Macrophage-1	TNL_v_TIL	ENSG00000131370	SH3BP5	72.1387	-0.780555	0.299808	-2.60352	0.00922721	0.195333
Macrophage-1	TNL_v_TIL	ENSG00000206560	ANKRD28	180.35	-0.770556	0.292455	-2.63479	0.008419	0.191544
Macrophage-1	TNL_v_TIL	ENSG00000144655	CSRNP1	224.24	-0.924359	0.255642	-3.61583	0.000299385	0.0271022
Macrophage-1	TNL_v_TIL	ENSG00000003756	RBM5	45.0539	-0.976404	0.36558	-2.67084	0.00756618	0.186249
Macrophage-1	TNL_v_TIL	ENSG00000010327	STAB1	188.05	-1.15664	0.328124	-3.52502	0.000423449	0.0329114
Macrophage-1	TNL_v_TIL	ENSG00000168386	FILIP1L	59.2129	-2.00795	0.364427	-5.50988	3.59073e-08	8.23473e-05
Macrophage-1	TNL_v_TIL	ENSG00000153283	CD96	14.3708	-1.69389	0.587702	-2.88222	0.00394879	0.125197
Macrophage-1	TNL_v_TIL	ENSG00000152601	MBNL1	211.764	-0.891294	0.256717	-3.4719	0.00051679	0.0367814
Macrophage-1	TNL_v_TIL	ENSG00000163659	TIPARP	130.945	-1.29027	0.289474	-4.45728	8.30045e-06	0.00335924
Macrophage-1	TNL_v_TIL	ENSG00000163660	CCNL1	424.83	-1.13972	0.265568	-4.29162	1.77376e-05	0.00469363
Macrophage-1	TNL_v_TIL	ENSG00000178053	MLF1	21.6214	-1.28623	0.483927	-2.65791	0.00786271	0.190428
Macrophage-1	TNL_v_TIL	ENSG00000075420	FNDC3B	124.824	-0.902902	0.281399	-3.20862	0.00133374	0.0626053
Macrophage-1	TNL_v_TIL	ENSG00000072274	TFRC	298.764	-1.01485	0.347628	-2.91937	0.00350738	0.11329
Macrophage-1	TNL_v_TIL	ENSG00000145107	TM4SF19	16.8578	2.45724	0.725723	3.38592	0.000709401	0.0460441
Macrophage-1	TNL_v_TIL	ENSG00000168214	RBPJ	166.015	-0.78249	0.254741	-3.0717	0.00212841	0.0856341
Macrophage-1	TNL_v_TIL	ENSG00000168421	RHOH	25.7572	-1.3688	0.507926	-2.69488	0.00704143	0.18002
Macrophage-1	TNL_v_TIL	ENSG00000169429	IL8	8100.98	-0.758487	0.268358	-2.8264	0.00470746	0.139001
Macrophage-1	TNL_v_TIL	ENSG00000081041	CXCL2	2245.99	-0.868176	0.281679	-3.08215	0.00205512	0.0836082
Macrophage-1	TNL_v_TIL	ENSG00000124882	EREG	247.034	-1.73422	0.637327	-2.72108	0.00650687	0.174366
Macrophage-1	TNL_v_TIL	ENSG00000138670	RASGEF1B	160.092	-1.00735	0.286367	-3.5177	0.00043531	0.0329114
Macrophage-1	TNL_v_TIL	ENSG00000118785	SPP1	11209.6	2.35073	0.627725	3.74485	0.000180504	0.0214854
Macrophage-1	TNL_v_TIL	ENSG00000138722	MMRN1	15.1196	-2.15823	0.780017	-2.7669	0.00565923	0.154506
Macrophage-1	TNL_v_TIL	ENSG00000109320	NFKB1	285.093	-1.35554	0.241346	-5.61658	1.94769e-08	6.70007e-05
Macrophage-1	TNL_v_TIL	ENSG00000137462	TLR2	44.5708	-1.2109	0.382362	-3.1669	0.00154075	0.0680306
Macrophage-1	TNL_v_TIL	ENSG00000052795	FNIP2	191.059	-0.896964	0.249641	-3.59302	0.00032687	0.0288316
Macrophage-1	TNL_v_TIL	ENSG00000154122	ANKH	63.7829	-1.14974	0.333228	-3.45033	0.000559911	0.038911
Macrophage-1	TNL_v_TIL	ENSG00000168685	IL7R	89.4093	-1.44003	0.439838	-3.27401	0.00106033	0.0544406
Macrophage-1	TNL_v_TIL	ENSG00000145649	GZMA	18.651	-1.5001	0.515604	-2.9094	0.00362124	0.116421
Macrophage-1	TNL_v_TIL	ENSG00000130449	ZSWIM6	59.6127	-0.98781	0.322863	-3.05954	0.00221679	0.0871515
Macrophage-1	TNL_v_TIL	ENSG00000038427	VCAN	29.5605	-1.44391	0.457724	-3.15454	0.0016075	0.0699975
Macrophage-1	TNL_v_TIL	ENSG00000118985	ELL2	174.024	-0.740481	0.253438	-2.92174	0.00348079	0.112961
Macrophage-1	TNL_v_TIL	ENSG00000153922	CHD1	99.3881	-0.733301	0.276638	-2.65076	0.00803115	0.190428
Macrophage-1	TNL_v_TIL	ENSG00000134986	NREP	19.684	1.47365	0.502361	2.93345	0.00335223	0.109825
Macrophage-1	TNL_v_TIL	ENSG00000131435	PDLIM4	16.0002	-1.88807	0.702103	-2.68916	0.00716327	0.180525
Macrophage-1	TNL_v_TIL	ENSG00000234290	AC116366.6	25.2806	-1.7992	0.480557	-3.74398	0.000181127	0.0214854
Macrophage-1	TNL_v_TIL	ENSG00000125347	IRF1	311.806	-0.802613	0.299442	-2.68036	0.00735422	0.183989
Macrophage-1	TNL_v_TIL	ENSG00000168246	UBTD2	25.3834	-1.28499	0.490789	-2.61822	0.00883907	0.192822
Macrophage-1	TNL_v_TIL	ENSG00000120149	MSX2	20.2332	1.61503	0.567279	2.84698	0.00441366	0.13496
Macrophage-1	TNL_v_TIL	ENSG00000145912	NHP2	102.276	0.813336	0.301015	2.70198	0.00689283	0.18002
Macrophage-1	TNL_v_TIL	ENSG00000170542	SERPINB9	221.954	-0.877876	0.281596	-3.1175	0.00182393	0.0769857
Macrophage-1	TNL_v_TIL	ENSG00000095951	HIVEP1	19.905	-1.30982	0.499475	-2.62238	0.00873168	0.192822
Macrophage-1	TNL_v_TIL	ENSG00000008083	JARID2	64.9262	-0.918562	0.324069	-2.83446	0.00459029	0.137459
Macrophage-1	TNL_v_TIL	ENSG00000172179	PRL	18.0561	-1.89181	0.708523	-2.67007	0.00758345	0.186249
Macrophage-1	TNL_v_TIL	ENSG00000112304	ACOT13	46.8076	0.998678	0.358174	2.78825	0.00529936	0.149425
Macrophage-1	TNL_v_TIL	ENSG00000204576	PRR3	12.5908	1.72213	0.638092	2.69887	0.00695744	0.18002
Macrophage-1	TNL_v_TIL	ENSG00000196230	TUBB	377.872	0.55645	0.203331	2.73667	0.00620647	0.168777
Macrophage-1	TNL_v_TIL	ENSG00000137331	IER3	1883.71	-0.630893	0.24459	-2.57939	0.00989759	0.199693
Macrophage-1	TNL_v_TIL	ENSG00000204388	HSPA1B	1536.47	0.986129	0.3001	3.286	0.00101619	0.0529653
Macrophage-1	TNL_v_TIL	ENSG00000232629	HLA-DQB2	20.5693	-2.86794	0.793072	-3.61624	0.000298908	0.0271022
Macrophage-1	TNL_v_TIL	ENSG00000112511	PHF1	39.5907	-1.00926	0.385268	-2.61963	0.0088024	0.192822
Macrophage-1	TNL_v_TIL	ENSG00000137309	HMGA1	234.182	0.774271	0.252945	3.06103	0.00220577	0.0871515
Macrophage-1	TNL_v_TIL	ENSG00000112033	PPARD	16.7881	-1.49787	0.576893	-2.59645	0.00941935	0.196527
Macrophage-1	TNL_v_TIL	ENSG00000096060	FKBP5	51.0812	-1.07607	0.398949	-2.69726	0.00699123	0.18002
Macrophage-1	TNL_v_TIL	ENSG00000095970	TREM2	587.228	0.995511	0.30079	3.30966	0.000934109	0.0513992
Macrophage-1	TNL_v_TIL	ENSG00000112715	VEGFA	152.92	-1.11216	0.302874	-3.67203	0.000240633	0.0239027
Macrophage-1	TNL_v_TIL	ENSG00000146070	PLA2G7	105.425	0.888236	0.340481	2.60877	0.00908694	0.19476
Macrophage-1	TNL_v_TIL	ENSG00000112118	MCM3	14.1671	1.9647	0.603135	3.25748	0.00112404	0.0568634
Macrophage-1	TNL_v_TIL	ENSG00000112773	FAM46A	201.327	0.747822	0.226401	3.30309	0.000956265	0.0513992
Macrophage-1	TNL_v_TIL	ENSG00000146278	PNRC1	1148.73	-0.792505	0.237521	-3.33657	0.000848178	0.0496033
Macrophage-1	TNL_v_TIL	ENSG00000118689	FOXO3	87.3482	-0.853944	0.296805	-2.87713	0.00401314	0.126075
Macrophage-1	TNL_v_TIL	ENSG00000172594	SMPDL3A	62.2897	-1.09304	0.412143	-2.65209	0.00799949	0.190428
Macrophage-1	TNL_v_TIL	ENSG00000111906	HDDC2	34.354	1.16947	0.414644	2.82043	0.00479596	0.140765
Macrophage-1	TNL_v_TIL	ENSG00000029363	BCLAF1	97.5543	-0.874674	0.292382	-2.99154	0.00277572	0.0999839
Macrophage-1	TNL_v_TIL	ENSG00000118503	TNFAIP3	512.574	-1.00164	0.280951	-3.56517	0.00036362	0.0305086
Macrophage-1	TNL_v_TIL	ENSG00000112406	HECA	65.283	-1.02556	0.322644	-3.17861	0.00147982	0.0669815
Macrophage-1	TNL_v_TIL	ENSG00000130340	SNX9	107.198	-1.00253	0.304798	-3.28918	0.0010048	0.0529585
Macrophage-1	TNL_v_TIL	ENSG00000112096	SOD2	2324.33	-1.02116	0.209345	-4.87789	1.07228e-06	0.000922158
Macrophage-1	TNL_v_TIL	ENSG00000157778	PSMG3	39.7449	1.14988	0.406053	2.83185	0.00462791	0.137836
Macrophage-1	TNL_v_TIL	ENSG00000075624	ACTB	8370.99	0.757074	0.212794	3.55778	0.000374005	0.030773
Macrophage-1	TNL_v_TIL	ENSG00000106546	AHR	150.513	-1.05578	0.29712	-3.55339	0.0003803	0.030773
Macrophage-1	TNL_v_TIL	ENSG00000006625	GGCT	45.0556	1.04861	0.385242	2.72195	0.00648985	0.174366
Macrophage-1	TNL_v_TIL	ENSG00000154710	RABGEF1	19.6174	-1.49932	0.524169	-2.86037	0.00423153	0.130551
Macrophage-1	TNL_v_TIL	ENSG00000127951	FGL2	121.803	-1.07498	0.334213	-3.21645	0.00129788	0.0622744
Macrophage-1	TNL_v_TIL	ENSG00000135218	CD36	191.212	2.11745	0.715227	2.96053	0.00307115	0.103576
Macrophage-1	TNL_v_TIL	ENSG00000242265	PEG10	36.7039	2.69176	0.901587	2.98558	0.00283039	0.0999959
Macrophage-1	TNL_v_TIL	ENSG00000106366	SERPINE1	423.441	-2.12848	0.672175	-3.16656	0.00154255	0.0680306
Macrophage-1	TNL_v_TIL	ENSG00000105835	NAMPT	356.105	-1.23037	0.236073	-5.2118	1.87014e-07	0.000321664
Macrophage-1	TNL_v_TIL	ENSG00000135241	PNPLA8	136.791	-0.872079	0.259529	-3.36024	0.00077874	0.0478369
Macrophage-1	TNL_v_TIL	ENSG00000106484	MEST	19.9243	1.70341	0.572399	2.97592	0.00292112	0.0999959
Macrophage-1	TNL_v_TIL	ENSG00000106565	TMEM176B	323.603	-0.922086	0.356824	-2.58415	0.0097619	0.198118
Macrophage-1	TNL_v_TIL	ENSG00000133612	AGAP3	58.2262	-0.871429	0.309232	-2.81804	0.00483176	0.140858
Macrophage-1	TNL_v_TIL	ENSG00000164825	DEFB1	25.9286	-4.0898	1.13033	-3.61825	0.000296607	0.0271022
Macrophage-1	TNL_v_TIL	ENSG00000104635	SLC39A14	12.7391	-2.20873	0.820009	-2.69355	0.00706965	0.18002
Macrophage-1	TNL_v_TIL	ENSG00000120889	TNFRSF10B	34.4422	-1.03299	0.397318	-2.59992	0.00932464	0.196527
Macrophage-1	TNL_v_TIL	ENSG00000120875	DUSP4	87.6834	-1.07385	0.41572	-2.58311	0.00979139	0.198132
Macrophage-1	TNL_v_TIL	ENSG00000077782	FGFR1	28.7395	-1.39656	0.430236	-3.24602	0.00117029	0.0583447
Macrophage-1	TNL_v_TIL	ENSG00000169490	TM2D2	48.4101	0.916075	0.346198	2.6461	0.00814262	0.190428
Macrophage-1	TNL_v_TIL	ENSG00000137563	GGH	28.1743	1.29336	0.396985	3.25796	0.00112214	0.0568634
Macrophage-1	TNL_v_TIL	ENSG00000164687	FABP5	1341.28	1.10187	0.238785	4.6145	3.94043e-06	0.00246456
Macrophage-1	TNL_v_TIL	ENSG00000104267	CA2	50.0097	1.24027	0.366285	3.38608	0.000708996	0.0460441
Macrophage-1	TNL_v_TIL	ENSG00000169439	SDC2	148.993	0.94366	0.301179	3.13322	0.00172897	0.0743459
Macrophage-1	TNL_v_TIL	ENSG00000178764	ZHX2	12.3424	-1.68897	0.649815	-2.59916	0.0093453	0.196527
Macrophage-1	TNL_v_TIL	ENSG00000104419	NDRG1	74.4948	-0.919545	0.307716	-2.9883	0.00280539	0.0999959
Macrophage-1	TNL_v_TIL	ENSG00000008513	ST3GAL1	52.6823	-1.00016	0.324665	-3.08059	0.0020659	0.0836082
Macrophage-1	TNL_v_TIL	ENSG00000178209	PLEC	101.165	-0.813556	0.267979	-3.0359	0.00239821	0.0926949
Macrophage-1	TNL_v_TIL	ENSG00000086062	B4GALT1	208.398	-1.32253	0.299276	-4.4191	9.91112e-06	0.00358887
Macrophage-1	TNL_v_TIL	ENSG00000135046	ANXA1	993.469	-0.789534	0.236472	-3.33881	0.000841368	0.0496033
Macrophage-1	TNL_v_TIL	ENSG00000135047	CTSL	876.833	-0.723459	0.270219	-2.6773	0.00742178	0.184339
Macrophage-1	TNL_v_TIL	ENSG00000165140	FBP1	113.853	1.11082	0.356289	3.11774	0.00182243	0.0769857
Macrophage-1	TNL_v_TIL	ENSG00000165029	ABCA1	178.125	-1.53423	0.382707	-4.00889	6.10059e-05	0.0107621
Macrophage-1	TNL_v_TIL	ENSG00000136810	TXN	1460.1	-1.12807	0.28752	-3.92344	8.72953e-05	0.0146486
Macrophage-1	TNL_v_TIL	ENSG00000056558	TRAF1	49.4878	-1.01102	0.383733	-2.63471	0.00842091	0.191544
Macrophage-1	TNL_v_TIL	ENSG00000148180	GSN	356.317	0.859798	0.32129	2.67608	0.00744891	0.184347
Macrophage-1	TNL_v_TIL	ENSG00000095303	PTGS1	24.9155	1.26748	0.425439	2.97923	0.00288973	0.0999959
Macrophage-1	TNL_v_TIL	ENSG00000119408	NEK6	51.4704	1.30036	0.35865	3.6257	0.000288178	0.0271022
Macrophage-1	TNL_v_TIL	ENSG00000187239	FNBP1	140.356	-1.00679	0.270508	-3.72184	0.000197779	0.0228788
Macrophage-1	TNL_v_TIL	ENSG00000107263	RAPGEF1	66.1091	-0.912144	0.315374	-2.89227	0.00382473	0.121825
Macrophage-1	TNL_v_TIL	ENSG00000122133	PAEP	14.5353	-4.0507	1.33025	-3.04506	0.00232634	0.0909389
Macrophage-1	TNL_v_TIL	ENSG00000067082	KLF6	1405.38	-0.943251	0.243787	-3.86916	0.000109212	0.0161652
Macrophage-1	TNL_v_TIL	ENSG00000136754	ABI1	115.488	-0.72866	0.277738	-2.62355	0.00870181	0.192822
Macrophage-1	TNL_v_TIL	ENSG00000107968	MAP3K8	270.419	-0.731304	0.277604	-2.63434	0.00843016	0.191544
Macrophage-1	TNL_v_TIL	ENSG00000122862	SRGN	3271.67	-0.89771	0.237688	-3.77683	0.000158835	0.0202367
Macrophage-1	TNL_v_TIL	ENSG00000107742	SPOCK2	19.0411	-1.79984	0.605347	-2.97324	0.00294678	0.100366
Macrophage-1	TNL_v_TIL	ENSG00000165678	GHITM	133.251	0.649468	0.248427	2.61432	0.00894042	0.192822
Macrophage-1	TNL_v_TIL	ENSG00000198682	PAPSS2	42.2106	-1.2672	0.36001	-3.51991	0.000431688	0.0329114
Macrophage-1	TNL_v_TIL	ENSG00000107798	LIPA	332.568	1.11499	0.311923	3.57455	0.00035083	0.0297989
Macrophage-1	TNL_v_TIL	ENSG00000077150	NFKB2	78.2262	-0.911011	0.302438	-3.01222	0.00259345	0.0944071
Macrophage-1	TNL_v_TIL	ENSG00000185201	IFITM2	391.229	-0.828229	0.238069	-3.47895	0.000503386	0.0364558
Macrophage-1	TNL_v_TIL	ENSG00000142089	IFITM3	1157.09	-1.0859	0.273061	-3.97676	6.98609e-05	0.0120161
Macrophage-1	TNL_v_TIL	ENSG00000130592	LSP1	356.451	1.38254	0.239983	5.76099	8.36227e-09	5.75324e-05
Macrophage-1	TNL_v_TIL	ENSG00000085063	CD59	265.482	-0.666423	0.250789	-2.65731	0.0078767	0.190428
Macrophage-1	TNL_v_TIL	ENSG00000026508	CD44	972.646	-0.639392	0.214495	-2.98091	0.0028739	0.0999959
Macrophage-1	TNL_v_TIL	ENSG00000109919	MTCH2	74.2639	1.07291	0.360424	2.97679	0.00291285	0.0999959
Macrophage-1	TNL_v_TIL	ENSG00000149131	SERPING1	245.038	-1.08703	0.351487	-3.09266	0.00198371	0.0812375
Macrophage-1	TNL_v_TIL	ENSG00000124942	AHNAK	202.883	-0.859411	0.23159	-3.71092	0.000206505	0.0229154
Macrophage-1	TNL_v_TIL	ENSG00000256690	RP11-727F15.9	49.2839	1.24	0.436475	2.84094	0.0044981	0.136933
Macrophage-1	TNL_v_TIL	ENSG00000245532	NEAT1	3283.23	-1.08178	0.276907	-3.90664	9.35875e-05	0.014974
Macrophage-1	TNL_v_TIL	ENSG00000175505	CLCF1	16.1608	-1.60132	0.61818	-2.59038	0.00958688	0.196889
Macrophage-1	TNL_v_TIL	ENSG00000213402	PTPRCAP	41.5742	-1.46982	0.444895	-3.30374	0.00095403	0.0513992
Macrophage-1	TNL_v_TIL	ENSG00000110717	NDUFS8	154.922	0.633703	0.242298	2.61539	0.00891267	0.192822
Macrophage-1	TNL_v_TIL	ENSG00000023445	BIRC3	152.259	-1.45282	0.339317	-4.2816	1.85557e-05	0.00472827
Macrophage-1	TNL_v_TIL	ENSG00000160584	SIK3	53.2494	-1.0065	0.380083	-2.64812	0.00809411	0.190428
Macrophage-1	TNL_v_TIL	ENSG00000198851	CD3E	24.8342	-2.38303	0.531548	-4.48319	7.35356e-06	0.00316203
Macrophage-1	TNL_v_TIL	ENSG00000167286	CD3D	33.6972	-1.77853	0.495457	-3.58968	0.000331085	0.0288338
Macrophage-1	TNL_v_TIL	ENSG00000111247	RAD51AP1	12.5737	1.76848	0.635488	2.78287	0.00538803	0.149474
Macrophage-1	TNL_v_TIL	ENSG00000111639	MRPL51	125.979	0.707302	0.252421	2.80207	0.00507764	0.146168
Macrophage-1	TNL_v_TIL	ENSG00000111678	C12orf57	150.14	-0.994491	0.260213	-3.82183	0.000132465	0.0178698
Macrophage-1	TNL_v_TIL	ENSG00000177575	CD163	273.475	-1.46237	0.344621	-4.24342	2.20136e-05	0.00540906
Macrophage-1	TNL_v_TIL	ENSG00000166523	CLEC4E	63.2344	-1.48798	0.407933	-3.64762	0.000264685	0.0252921
Macrophage-1	TNL_v_TIL	ENSG00000139112	GABARAPL1	131.743	-0.713305	0.275028	-2.59357	0.00949854	0.196889
Macrophage-1	TNL_v_TIL	ENSG00000134531	EMP1	224.479	-0.907023	0.259307	-3.49787	0.000468998	0.0348701
Macrophage-1	TNL_v_TIL	ENSG00000008394	MGST1	96.3266	1.45309	0.39122	3.71426	0.000203801	0.0229154
Macrophage-1	TNL_v_TIL	ENSG00000111716	LDHB	135.632	1.27618	0.296135	4.30946	1.63655e-05	0.00458628
Macrophage-1	TNL_v_TIL	ENSG00000061794	MRPS35	35.6445	1.14968	0.381102	3.01673	0.00255518	0.0944071
Macrophage-1	TNL_v_TIL	ENSG00000134291	TMEM106C	22.3893	1.5072	0.501468	3.00558	0.00265075	0.0959851
Macrophage-1	TNL_v_TIL	ENSG00000170545	SMAGP	26.0409	2.085	0.48299	4.31687	1.58261e-05	0.00458628
Macrophage-1	TNL_v_TIL	ENSG00000161835	GRASP	41.8137	-1.48226	0.424333	-3.49315	0.000477361	0.0349388
Macrophage-1	TNL_v_TIL	ENSG00000161638	ITGA5	108.639	-0.937212	0.31718	-2.95483	0.00312841	0.104552
Macrophage-1	TNL_v_TIL	ENSG00000123342	MMP19	147.644	-1.89809	0.380589	-4.98724	6.12487e-07	0.000601987
Macrophage-1	TNL_v_TIL	ENSG00000197728	RPS26	2160.17	-0.930791	0.27233	-3.41787	0.000631128	0.0425702
Macrophage-1	TNL_v_TIL	ENSG00000111596	CNOT2	71.486	-0.85159	0.312716	-2.72321	0.00646509	0.174366
Macrophage-1	TNL_v_TIL	ENSG00000173451	THAP2	91.4089	-0.91551	0.328812	-2.7843	0.0053644	0.149474
Macrophage-1	TNL_v_TIL	ENSG00000111144	LTA4H	101.741	0.931161	0.309066	3.01282	0.00258834	0.0944071
Macrophage-1	TNL_v_TIL	ENSG00000111231	GPN3	30.452	1.19342	0.452476	2.63753	0.00835112	0.191544
Macrophage-1	TNL_v_TIL	ENSG00000196850	PPTC7	42.7397	-1.00219	0.378927	-2.64482	0.00817349	0.190428
Macrophage-1	TNL_v_TIL	ENSG00000111252	SH2B3	68.1976	-0.911986	0.328575	-2.77558	0.00551032	0.151644
Macrophage-1	TNL_v_TIL	ENSG00000120690	ELF1	168.868	-0.971818	0.264005	-3.68106	0.000232265	0.0238505
Macrophage-1	TNL_v_TIL	ENSG00000139679	LPAR6	120.468	0.848783	0.315235	2.69254	0.00709092	0.18002
Macrophage-1	TNL_v_TIL	ENSG00000247400	DNAJC3-AS1	19.4686	1.55427	0.495395	3.13743	0.00170435	0.0737479
Macrophage-1	TNL_v_TIL	ENSG00000169508	GPR183	805.643	-0.889436	0.327546	-2.71545	0.00661857	0.175137
Macrophage-1	TNL_v_TIL	ENSG00000100823	APEX1	100.775	0.962244	0.278083	3.46028	0.000539622	0.0378837
Macrophage-1	TNL_v_TIL	ENSG00000100889	PCK2	20.2599	1.48346	0.503547	2.94602	0.00321894	0.106987
Macrophage-1	TNL_v_TIL	ENSG00000258486	RN7SL1	102.448	1.75195	0.369316	4.74378	2.09766e-06	0.00144319
Macrophage-1	TNL_v_TIL	ENSG00000165502	RPL36AL	852.55	-0.639954	0.198598	-3.22236	0.0012714	0.0616003
Macrophage-1	TNL_v_TIL	ENSG00000126803	HSPA2	74.765	1.15477	0.352287	3.27793	0.0010457	0.0540935
Macrophage-1	TNL_v_TIL	ENSG00000072042	RDH11	44.1969	1.0224	0.338455	3.02077	0.00252132	0.0944071
Macrophage-1	TNL_v_TIL	ENSG00000100650	SRSF5	373.089	-0.939991	0.246941	-3.80655	0.000140921	0.018598
Macrophage-1	TNL_v_TIL	ENSG00000197555	SIPA1L1	38.1658	-1.63585	0.442582	-3.69616	0.000218887	0.0231683
Macrophage-1	TNL_v_TIL	ENSG00000185215	TNFAIP2	167.982	-1.02425	0.292934	-3.49653	0.000471355	0.0348701
Macrophage-1	TNL_v_TIL	ENSG00000166428	PLD4	21.4912	1.51608	0.472626	3.20778	0.00133764	0.0626053
Macrophage-1	TNL_v_TIL	ENSG00000183484	GPR132	32.5275	-1.51921	0.454217	-3.34467	0.000823791	0.0496033
Macrophage-1	TNL_v_TIL	ENSG00000182809	CRIP2	37.8298	-1.56541	0.55306	-2.83046	0.0046481	0.13784
Macrophage-1	TNL_v_TIL	ENSG00000213145	CRIP1	962.544	-2.52629	0.795841	-3.17436	0.00150166	0.0670871
Macrophage-1	TNL_v_TIL	ENSG00000169926	KLF13	23.1352	-1.58324	0.477749	-3.31396	0.000919849	0.0513992
Macrophage-1	TNL_v_TIL	ENSG00000248905	FMN1	19.3661	-1.37815	0.490565	-2.80932	0.00496467	0.144122
Macrophage-1	TNL_v_TIL	ENSG00000137824	RMDN3	67.059	1.29645	0.379961	3.41206	0.000644741	0.0430662
Macrophage-1	TNL_v_TIL	ENSG00000137880	GCHFR	401.49	1.12729	0.363107	3.10457	0.00190555	0.0785042
Macrophage-1	TNL_v_TIL	ENSG00000166145	SPINT1	64.5725	1.52019	0.346969	4.38135	1.17947e-05	0.0039084
Macrophage-1	TNL_v_TIL	ENSG00000069667	RORA	23.6737	-2.4168	0.535125	-4.51634	6.29189e-06	0.00288588
Macrophage-1	TNL_v_TIL	ENSG00000166803	KIAA0101	45.7995	1.66708	0.433891	3.84217	0.000121953	0.0171232
Macrophage-1	TNL_v_TIL	ENSG00000140403	DNAJA4	93.6608	0.978328	0.267618	3.65568	0.000256496	0.0248549
Macrophage-1	TNL_v_TIL	ENSG00000170776	AKAP13	217.583	-0.893263	0.267144	-3.34375	0.000826534	0.0496033
Macrophage-1	TNL_v_TIL	ENSG00000182054	IDH2	101.177	1.002	0.297799	3.36466	0.000766369	0.0478369
Macrophage-1	TNL_v_TIL	ENSG00000140575	IQGAP1	230.295	-0.738773	0.231492	-3.19136	0.00141607	0.0645201
Macrophage-1	TNL_v_TIL	ENSG00000173575	CHD2	126.493	-0.889082	0.284222	-3.12813	0.00175925	0.0751778
Macrophage-1	TNL_v_TIL	ENSG00000131873	CHSY1	40.0111	-1.34416	0.39089	-3.43871	0.000584484	0.0402125
Macrophage-1	TNL_v_TIL	ENSG00000161980	POLR3K	21.1233	1.50857	0.52652	2.86518	0.00416771	0.129162
Macrophage-1	TNL_v_TIL	ENSG00000008517	IL32	98.2045	-1.17877	0.36662	-3.21523	0.00130342	0.0622744
Macrophage-1	TNL_v_TIL	ENSG00000213853	EMP2	24.0111	-1.21845	0.452949	-2.69003	0.00714455	0.180525
Macrophage-1	TNL_v_TIL	ENSG00000157106	SMG1	70.5157	-0.935133	0.34371	-2.7207	0.00651433	0.174366
Macrophage-1	TNL_v_TIL	ENSG00000102879	CORO1A	219.114	0.791403	0.269358	2.93811	0.00330221	0.109211
Macrophage-1	TNL_v_TIL	ENSG00000089280	FUS	353.889	-0.605747	0.231263	-2.6193	0.00881104	0.192822
Macrophage-1	TNL_v_TIL	ENSG00000185947	ZNF267	82.1605	-0.915683	0.31558	-2.90158	0.00371281	0.11881
Macrophage-1	TNL_v_TIL	ENSG00000217555	CKLF	221.79	0.86209	0.231768	3.71962	0.000199524	0.0228788
Macrophage-1	TNL_v_TIL	ENSG00000140931	CMTM3	110.8	0.684154	0.262192	2.60936	0.00907116	0.19476
Macrophage-1	TNL_v_TIL	ENSG00000159713	TPPP3	23.5737	-4.03515	1.16254	-3.47097	0.000518576	0.0367814
Macrophage-1	TNL_v_TIL	ENSG00000039523	FAM65A	41.7302	-0.986606	0.363008	-2.71787	0.00657045	0.174535
Macrophage-1	TNL_v_TIL	ENSG00000102908	NFAT5	101.808	-1.01318	0.287059	-3.52952	0.000416307	0.0329114
Macrophage-1	TNL_v_TIL	ENSG00000167515	TRAPPC2L	82.6304	0.963742	0.313929	3.06993	0.00214106	0.0856424
Macrophage-1	TNL_v_TIL	ENSG00000108528	SLC25A11	56.552	0.911225	0.325556	2.79898	0.00512645	0.146958
Macrophage-1	TNL_v_TIL	ENSG00000132514	CLEC10A	52.5849	-1.54908	0.468024	-3.30984	0.000933487	0.0513992
Macrophage-1	TNL_v_TIL	ENSG00000132510	KDM6B	184.97	-1.3008	0.287178	-4.52961	5.90937e-06	0.00288588
Macrophage-1	TNL_v_TIL	ENSG00000004142	POLDIP2	41.1476	0.928971	0.354575	2.61995	0.00879415	0.192822
Macrophage-1	TNL_v_TIL	ENSG00000161570	CCL5	254.064	-1.78133	0.581684	-3.06237	0.00219589	0.0871515
Macrophage-1	TNL_v_TIL	ENSG00000006074	CCL18	2182.04	-3.71509	1.00414	-3.69977	0.000215794	0.0231683
Macrophage-1	TNL_v_TIL	ENSG00000131759	RARA	43.2174	-1.03843	0.385661	-2.69259	0.00708986	0.18002
Macrophage-1	TNL_v_TIL	ENSG00000108786	HSD17B1	13.5438	2.64377	0.720158	3.67109	0.000241516	0.0239027
Macrophage-1	TNL_v_TIL	ENSG00000131462	TUBG1	18.2077	1.25779	0.485363	2.59144	0.00955757	0.196889
Macrophage-1	TNL_v_TIL	ENSG00000167085	PHB	102.032	0.718733	0.272705	2.63557	0.0083997	0.191544
Macrophage-1	TNL_v_TIL	ENSG00000239672	NME1	98.1531	1.05066	0.276311	3.80246	0.000143269	0.018598
Macrophage-1	TNL_v_TIL	ENSG00000175155	YPEL2	23.3973	-1.23179	0.465456	-2.64641	0.00813502	0.190428
Macrophage-1	TNL_v_TIL	ENSG00000186407	CD300E	17.1886	-1.80197	0.678093	-2.6574	0.00787454	0.190428
Macrophage-1	TNL_v_TIL	ENSG00000182534	MXRA7	17.7013	-1.71248	0.585474	-2.92494	0.00344524	0.112338
Macrophage-1	TNL_v_TIL	ENSG00000167900	TK1	24.7078	1.94801	0.539696	3.60946	0.000306833	0.0274158
Macrophage-1	TNL_v_TIL	ENSG00000184557	SOCS3	212.365	-0.670835	0.237917	-2.81962	0.0048081	0.140765
Macrophage-1	TNL_v_TIL	ENSG00000108669	CYTH1	96.6871	-0.945315	0.283764	-3.33134	0.0008643	0.0496033
Macrophage-1	TNL_v_TIL	ENSG00000176845	METRNL	114.102	-0.82732	0.273232	-3.0279	0.00246256	0.0944071
Macrophage-1	TNL_v_TIL	ENSG00000176890	TYMS	14.499	2.22497	0.573071	3.88253	0.000103375	0.0158049
Macrophage-1	TNL_v_TIL	ENSG00000152234	ATP5A1	139.525	0.881514	0.29835	2.95463	0.00313047	0.104552
Macrophage-1	TNL_v_TIL	ENSG00000082212	ME2	74.6916	1.14578	0.322485	3.55298	0.000380892	0.030773
Macrophage-1	TNL_v_TIL	ENSG00000088827	SIGLEC1	72.2723	-1.11128	0.399046	-2.78484	0.00535548	0.149474
Macrophage-1	TNL_v_TIL	ENSG00000101220	C20orf27	58.3551	0.970321	0.372364	2.60584	0.00916485	0.195333
Macrophage-1	TNL_v_TIL	ENSG00000125772	GPCPD1	95.7483	-1.00607	0.292853	-3.4354	0.000591681	0.0403046
Macrophage-1	TNL_v_TIL	ENSG00000178726	THBD	107.982	-0.769282	0.296312	-2.59619	0.00942644	0.196527
Macrophage-1	TNL_v_TIL	ENSG00000078804	TP53INP2	21.5606	-1.49538	0.526915	-2.83799	0.00453981	0.137372
Macrophage-1	TNL_v_TIL	ENSG00000131051	RBM39	390.476	-0.64706	0.233432	-2.77194	0.00557227	0.152738
Macrophage-1	TNL_v_TIL	ENSG00000124107	SLPI	13.563	-3.66206	1.29214	-2.83411	0.00459529	0.137459
Macrophage-1	TNL_v_TIL	ENSG00000124145	SDC4	121.218	-1.70191	0.384142	-4.43042	9.40517e-06	0.00358887
Macrophage-1	TNL_v_TIL	ENSG00000100979	PLTP	928.203	-0.83533	0.317838	-2.62816	0.00858481	0.192389
Macrophage-1	TNL_v_TIL	ENSG00000196562	SULF2	20.9876	-1.79914	0.547153	-3.28818	0.00100837	0.0529585
Macrophage-1	TNL_v_TIL	ENSG00000124216	SNAI1	81.843	1.59536	0.434785	3.66932	0.000243196	0.0239027
Macrophage-1	TNL_v_TIL	ENSG00000172216	CEBPB	833.635	-0.655317	0.202403	-3.23768	0.00120507	0.0592207
Macrophage-1	TNL_v_TIL	ENSG00000224397	RP11-290F20.3	143.553	1.21824	0.329274	3.69976	0.0002158	0.0231683
Macrophage-1	TNL_v_TIL	ENSG00000196396	PTPN1	92.9567	-0.975769	0.294961	-3.30813	0.000939223	0.0513992
Macrophage-1	TNL_v_TIL	ENSG00000124225	PMEPA1	36.8393	-1.08366	0.406012	-2.66903	0.00760695	0.186249
Macrophage-1	TNL_v_TIL	ENSG00000167470	MIDN	165.423	-0.733299	0.276713	-2.65003	0.00804841	0.190428
Macrophage-1	TNL_v_TIL	ENSG00000099800	TIMM13	162.991	0.763038	0.252767	3.01874	0.00253827	0.0944071
Macrophage-1	TNL_v_TIL	ENSG00000104964	AES	117.157	-0.721624	0.27402	-2.63347	0.00845164	0.191544
Macrophage-1	TNL_v_TIL	ENSG00000007264	MATK	38.4203	2.26545	0.472162	4.79803	1.60237e-06	0.00122492
Macrophage-1	TNL_v_TIL	ENSG00000130254	SAFB2	50.9429	-1.16272	0.349054	-3.33106	0.000865173	0.0496033
Macrophage-1	TNL_v_TIL	ENSG00000087903	RFX2	34.9374	-1.30796	0.438938	-2.97983	0.00288411	0.0999959
Macrophage-1	TNL_v_TIL	ENSG00000125735	TNFSF14	26.3984	1.56498	0.470862	3.32365	0.000888463	0.0505176
Macrophage-1	TNL_v_TIL	ENSG00000167772	ANGPTL4	35.3378	-2.0293	0.464657	-4.36729	1.25795e-05	0.00393396
Macrophage-1	TNL_v_TIL	ENSG00000244165	P2RY11	18.3635	1.73913	0.584406	2.97589	0.00292139	0.0999959
Macrophage-1	TNL_v_TIL	ENSG00000090339	ICAM1	300.254	-1.0688	0.276429	-3.86645	0.000110431	0.0161652
Macrophage-1	TNL_v_TIL	ENSG00000104915	STX10	59.7351	0.90243	0.324183	2.78371	0.00537413	0.149474
Macrophage-1	TNL_v_TIL	ENSG00000267519	MIR24-2	48.4802	-1.21712	0.378799	-3.2131	0.0013131	0.0623042
Macrophage-1	TNL_v_TIL	ENSG00000123146	CD97	142.362	-1.19439	0.297399	-4.01612	5.91642e-05	0.0107118
Macrophage-1	TNL_v_TIL	ENSG00000130312	MRPL34	82.6197	0.747622	0.281715	2.65383	0.00795843	0.190428
Macrophage-1	TNL_v_TIL	ENSG00000130522	JUND	870.518	-1.08585	0.252205	-4.30544	1.66653e-05	0.00458628
Macrophage-1	TNL_v_TIL	ENSG00000105656	ELL	37.4713	-1.22338	0.406072	-3.01271	0.00258925	0.0944071
Macrophage-1	TNL_v_TIL	ENSG00000104824	HNRNPL	47.7025	-1.0623	0.35877	-2.96096	0.00306683	0.103576
Macrophage-1	TNL_v_TIL	ENSG00000028277	POU2F2	55.1792	1.04826	0.391477	2.67769	0.00741314	0.184339
Macrophage-1	TNL_v_TIL	ENSG00000125740	FOSB	988.761	-1.01229	0.251325	-4.0278	5.63013e-05	0.010469
Macrophage-1	TNL_v_TIL	ENSG00000105374	NKG7	108.862	-0.972129	0.368699	-2.63664	0.00837311	0.191544
Macrophage-1	TNL_v_TIL	ENSG00000171051	FPR1	63.2884	-1.08861	0.36528	-2.9802	0.00288061	0.0999959
Macrophage-1	TNL_v_TIL	ENSG00000179820	MYADM	270.478	-0.777038	0.26992	-2.87877	0.00399228	0.125995
Macrophage-1	TNL_v_TIL	ENSG00000105618	PRPF31	43.0472	0.938051	0.35674	2.62951	0.00855082	0.192254
Macrophage-1	TNL_v_TIL	ENSG00000268164	CTD-2337J16.1	18.907	-1.60618	0.560092	-2.86771	0.00413455	0.128714
Macrophage-1	TNL_v_TIL	ENSG00000105609	LILRB5	46.5052	-2.05318	0.449012	-4.57266	4.8158e-06	0.00276106
Macrophage-1	TNL_v_TIL	ENSG00000184113	CLDN5	18.0994	-3.22214	0.783077	-4.11471	3.87663e-05	0.00860362
Macrophage-1	TNL_v_TIL	ENSG00000185339	TCN2	102.835	-1.20809	0.313322	-3.85576	0.000115373	0.0165368
Macrophage-1	TNL_v_TIL	ENSG00000128245	YWHAH	342.753	0.580536	0.215186	2.69784	0.00697911	0.18002
Macrophage-1	TNL_v_TIL	ENSG00000100292	HMOX1	789.518	-0.780029	0.279462	-2.79118	0.00525162	0.149425
Macrophage-1	TNL_v_TIL	ENSG00000185022	MAFF	145.206	-1.36713	0.336792	-4.05925	4.92296e-05	0.0096626
Macrophage-1	TNL_v_TIL	ENSG00000155307	SAMSN1	158.213	-1.05003	0.257699	-4.07465	4.60836e-05	0.00960773
Macrophage-1	TNL_v_TIL	ENSG00000156273	BACH1	56.9515	-0.925989	0.340504	-2.71947	0.00653873	0.174366
Macrophage-1	TNL_v_TIL	ENSG00000159200	RCAN1	57.7796	-1.30984	0.393213	-3.33111	0.000865	0.0496033
Macrophage-1	TNL_v_TIL	ENSG00000157557	ETS2	229.513	-0.914809	0.272121	-3.36178	0.000774426	0.0478369
Macrophage-1	TNL_v_TIL	ENSG00000160179	ABCG1	43.8407	-1.1554	0.361779	-3.19367	0.00140479	0.0645201
Macrophage-1	TNL_v_TIL	ENSG00000142178	SIK1	129.896	-0.858341	0.259715	-3.30493	0.000950013	0.0513992
Macrophage-1	TNL_v_TIL	ENSG00000160221	C21orf33	52.6415	1.02127	0.395029	2.58531	0.00972909	0.198036
LED	TNL_v_TIL	ENSG00000186827	TNFRSF4	196.995	1.61992	0.40649	3.98515	6.74371e-05	0.063271
LED	TNL_v_TIL	ENSG00000162552	WNT4	19.9054	-3.2733	0.859623	-3.80783	0.000140194	0.0986496
LED	TNL_v_TIL	ENSG00000116774	OLFML3	41.9525	2.41112	0.49143	4.90634	9.27915e-07	0.00261177
LED	TNL_v_TIL	ENSG00000114698	PLSCR4	664.689	1.14076	0.30941	3.68689	0.000227014	0.136922
LED	TNL_v_TIL	ENSG00000049192	ADAMTS6	250.434	1.27765	0.307372	4.15671	3.22866e-05	0.0389469
LED	TNL_v_TIL	ENSG00000078401	EDN1	646.101	1.46357	0.292995	4.9952	5.87735e-07	0.00248142
LED	TNL_v_TIL	ENSG00000127951	FGL2	334.96	-1.4764	0.30473	-4.84494	1.2665e-06	0.00267358
LED	TNL_v_TIL	ENSG00000147889	CDKN2A	304.609	1.77129	0.402738	4.39811	1.09196e-05	0.0153675
LED	TNL_v_TIL	ENSG00000152465	NMT2	236.622	1.24414	0.332868	3.73764	0.000185753	0.120654
LED	TNL_v_TIL	ENSG00000148677	ANKRD1	394.615	2.62037	0.380621	6.88445	5.80124e-12	4.89857e-08
LED	TNL_v_TIL	ENSG00000213185	FAM24B	24.8707	2.90032	0.751946	3.85708	0.000114749	0.0880855
LED	TNL_v_TIL	ENSG00000245532	NEAT1	4179.58	-1.16784	0.292721	-3.98959	6.61875e-05	0.063271
LED	TNL_v_TIL	ENSG00000150687	PRSS23	1657.36	0.849829	0.218001	3.89829	9.6875e-05	0.0818012
LED	TNL_v_TIL	ENSG00000184470	TXNRD2	217.127	1.88705	0.393684	4.79331	1.64049e-06	0.00277046
EVT	TNL_v_TIL	ENSG00000228594	C1orf233	75.4202	-1.13626	0.301036	-3.77449	0.000160333	0.0693556
EVT	TNL_v_TIL	ENSG00000117461	PIK3R3	26.1223	1.76742	0.520329	3.39674	0.000681941	0.194804
EVT	TNL_v_TIL	ENSG00000233030	RP11-196G18.3	20.1818	3.11061	0.556672	5.58788	2.29862e-08	6.96022e-05
EVT	TNL_v_TIL	ENSG00000162733	DDR2	30.162	2.15742	0.563526	3.82843	0.000128965	0.0574273
EVT	TNL_v_TIL	ENSG00000185860	C1orf110	7.37703	3.78739	1.06687	3.55002	0.000385209	0.130104
EVT	TNL_v_TIL	ENSG00000163435	ELF3	1246.24	1.31395	0.275666	4.76648	1.87473e-06	0.00236528
EVT	TNL_v_TIL	ENSG00000086619	ERO1LB	74.1171	1.39162	0.405805	3.42928	0.000605179	0.176727
EVT	TNL_v_TIL	ENSG00000115738	ID2	928.425	1.15366	0.296794	3.88706	0.000101465	0.0476344
EVT	TNL_v_TIL	ENSG00000230773	AC079807.4	21.2436	-3.02657	0.670958	-4.51082	6.45784e-06	0.00698369
EVT	TNL_v_TIL	ENSG00000115844	DLX2	39.8035	1.91696	0.491019	3.90404	9.45986e-05	0.0476344
EVT	TNL_v_TIL	ENSG00000206573	SETD5-AS1	199.755	1.49281	0.292246	5.10807	3.25471e-07	0.000703948
EVT	TNL_v_TIL	ENSG00000254999	BRK1	1190.81	-0.662849	0.177422	-3.736	0.000186972	0.0744938
EVT	TNL_v_TIL	ENSG00000235236	RP13-131K19.1	14.1611	3.31731	0.728246	4.5552	5.23349e-06	0.006095
EVT	TNL_v_TIL	ENSG00000163661	PTX3	18.767	-4.79584	1.22775	-3.90619	9.37613e-05	0.0476344
EVT	TNL_v_TIL	ENSG00000251580	RP11-539L10.3	32.6428	-2.13028	0.607131	-3.50877	0.000450184	0.145017
EVT	TNL_v_TIL	ENSG00000260265	RP11-44F21.5	3.98744	-4.90817	1.43159	-3.42847	0.000606988	0.176727
EVT	TNL_v_TIL	ENSG00000113070	HBEGF	80.719	1.81072	0.309757	5.84562	5.0469e-09	1.91025e-05
EVT	TNL_v_TIL	ENSG00000156427	FGF18	26.7355	2.18481	0.610233	3.58029	0.000343209	0.125673
EVT	TNL_v_TIL	ENSG00000187990	HIST1H2BG	14.1671	3.62542	0.826183	4.38815	1.14318e-05	0.010181
EVT	TNL_v_TIL	ENSG00000198502	HLA-DRB5	16.9422	-2.39512	0.594593	-4.02816	5.62147e-05	0.032854
EVT	TNL_v_TIL	ENSG00000105928	DFNA5	876.545	-1.11485	0.264421	-4.21619	2.48465e-05	0.0178897
EVT	TNL_v_TIL	ENSG00000250397	RP11-1391J7.1	12.0915	4.13596	0.965188	4.28513	1.8263e-05	0.0145527
EVT	TNL_v_TIL	ENSG00000269821	KCNQ1OT1	1013.13	2.04877	0.330743	6.19445	5.84903e-10	4.42771e-06
EVT	TNL_v_TIL	ENSG00000121236	TRIM6	51.8282	-1.19666	0.353833	-3.38199	0.000719631	0.196987
EVT	TNL_v_TIL	ENSG00000169519	METTL15	117.152	1.17722	0.237325	4.96037	7.03595e-07	0.00106524
EVT	TNL_v_TIL	ENSG00000256690	RP11-727F15.9	137.812	2.13132	0.407743	5.22712	1.72169e-07	0.00043444
EVT	TNL_v_TIL	ENSG00000158555	GDPD5	78.4642	1.35399	0.381515	3.549	0.000386703	0.130104
EVT	TNL_v_TIL	ENSG00000165494	PCF11	212.506	1.12034	0.262608	4.26619	1.98838e-05	0.015052
EVT	TNL_v_TIL	ENSG00000188486	H2AFX	403.5	0.989991	0.286795	3.45191	0.000556631	0.168548
EVT	TNL_v_TIL	ENSG00000123411	IKZF4	21.8422	1.60645	0.449207	3.5762	0.000348632	0.125673
EVT	TNL_v_TIL	ENSG00000139278	GLIPR1	3782.62	-0.750904	0.222249	-3.37865	0.000728415	0.196987
EVT	TNL_v_TIL	ENSG00000165572	KBTBD6	64.9165	1.32866	0.370486	3.58627	0.000335443	0.125673
EVT	TNL_v_TIL	ENSG00000150510	FAM124A	12.7694	4.4366	1.18483	3.74451	0.000180745	0.0739589
EVT	TNL_v_TIL	ENSG00000102786	INTS6	276.679	0.963371	0.275127	3.50156	0.00046255	0.145896
EVT	TNL_v_TIL	ENSG00000259001	RPPH1	125.739	2.61706	0.60407	4.33237	1.47513e-05	0.0124075
EVT	TNL_v_TIL	ENSG00000198208	RPS6KL1	9.02661	4.84012	1.18606	4.08084	4.48724e-05	0.028307
EVT	TNL_v_TIL	ENSG00000267795	SMIM22	93.0928	2.28276	0.458253	4.98145	6.311e-07	0.00106165
EVT	TNL_v_TIL	ENSG00000261359	C16orf98	30.8215	2.11271	0.5134	4.11513	3.8696e-05	0.0254721
EVT	TNL_v_TIL	ENSG00000261925	RP11-388M20.9	11.6033	3.35827	0.948718	3.5398	0.000400433	0.131795
EVT	TNL_v_TIL	ENSG00000129194	SOX15	73.4793	1.52602	0.344388	4.43111	9.37487e-06	0.00887097
EVT	TNL_v_TIL	ENSG00000263874	LINC00672	25.0249	1.90499	0.473018	4.0273	5.64203e-05	0.032854
EVT	TNL_v_TIL	ENSG00000188825	LINC00910	194.251	2.50746	0.631297	3.97191	7.12991e-05	0.0399803
EVT	TNL_v_TIL	ENSG00000186834	HEXIM1	898.184	1.05964	0.298557	3.54921	0.000386395	0.130104
EVT	TNL_v_TIL	ENSG00000108384	RAD51C	377.942	-0.682687	0.186621	-3.65815	0.000254038	0.0986189
EVT	TNL_v_TIL	ENSG00000271605	MILR1	24.2741	2.31879	0.668956	3.46628	0.000527722	0.163055
EVT	TNL_v_TIL	ENSG00000141582	CBX4	116.961	1.27163	0.26207	4.85226	1.22059e-06	0.00167998
EVT	TNL_v_TIL	ENSG00000268852	AC132872.2	42.5939	1.76747	0.394301	4.48254	7.37593e-06	0.00744478
EVT	TNL_v_TIL	ENSG00000260257	RP5-1085F17.3	91.7717	1.1171	0.297551	3.75432	0.000173815	0.0730989
EVT	TNL_v_TIL	ENSG00000124116	WFDC3	81.8414	-1.55587	0.399875	-3.89089	9.98776e-05	0.0476344
EVT	TNL_v_TIL	ENSG00000124216	SNAI1	718.74	1.17708	0.303257	3.88147	0.000103827	0.0476344
EVT	TNL_v_TIL	ENSG00000099617	EFNA2	18.4221	3.93435	0.935419	4.20598	2.59956e-05	0.0178897
EVT	TNL_v_TIL	ENSG00000105650	PDE4C	94.8255	1.67113	0.494624	3.37858	0.000728617	0.196987
EVT	TNL_v_TIL	ENSG00000171747	LGALS4	19.3376	3.23587	0.639588	5.0593	4.20794e-07	0.000796353
EVT	TNL_v_TIL	ENSG00000006659	LGALS14	68.3219	-2.48342	0.627168	-3.95974	7.50326e-05	0.0405712
EVT	TNL_v_TIL	ENSG00000105227	PRX	26.9236	2.84819	0.477646	5.96298	2.47682e-09	1.24997e-05
EVT	TNL_v_TIL	ENSG00000028277	POU2F2	44.6372	4.12631	0.625227	6.59969	4.12008e-11	6.2378e-07
Monocyte	TNL_v_TIL	ENSG00000183891	TTC32	13.963	2.06966	0.613787	3.37195	0.000746391	0.173163
Monocyte	TNL_v_TIL	ENSG00000115523	GNLY	37.9464	-3.78654	0.945001	-4.00692	6.15156e-05	0.0355671
Monocyte	TNL_v_TIL	ENSG00000153234	NR4A2	78.1255	-1.21248	0.327102	-3.70674	0.000209941	0.0730594
Monocyte	TNL_v_TIL	ENSG00000118785	SPP1	231.48	5.08873	0.941346	5.4058	6.45185e-08	0.000112262
Monocyte	TNL_v_TIL	ENSG00000250722	SEPP1	21.8407	2.13855	0.632088	3.38332	0.000716153	0.173163
Monocyte	TNL_v_TIL	ENSG00000146678	IGFBP1	16.198	-4.22186	1.06315	-3.97109	7.15431e-05	0.0355671
Monocyte	TNL_v_TIL	ENSG00000120885	CLU	19.6902	-3.26794	0.98372	-3.32202	0.000893685	0.189402
Monocyte	TNL_v_TIL	ENSG00000198576	ARC	15.8669	2.73976	0.652596	4.19825	2.6899e-05	0.0234021
Monocyte	TNL_v_TIL	ENSG00000142089	IFITM3	291.581	-1.25877	0.311074	-4.04654	5.19811e-05	0.0355671
Monocyte	TNL_v_TIL	ENSG00000197728	RPS26	929.994	-1.11299	0.310887	-3.58004	0.00034354	0.0993576
Monocyte	TNL_v_TIL	ENSG00000126803	HSPA2	20.5864	1.71071	0.439297	3.89421	9.85204e-05	0.0428564
Monocyte	TNL_v_TIL	ENSG00000172236	TPSAB1	170.126	-9.86624	1.82289	-5.41242	6.21795e-08	0.000112262
Monocyte	TNL_v_TIL	ENSG00000125148	MT2A	248.987	-1.31361	0.369015	-3.55978	0.000371164	0.0993576
Monocyte	TNL_v_TIL	ENSG00000242550	SERPINB10	11.7094	2.43783	0.735987	3.31233	0.000925239	0.189402
Monocyte	TNL_v_TIL	ENSG00000172216	CEBPB	237.133	-0.774661	0.207118	-3.74019	0.000183884	0.0711019
Monocyte	TNL_v_TIL	ENSG00000224397	RP11-290F20.3	52.4307	-1.90685	0.431178	-4.42243	9.7598e-06	0.0113214
Monocyte	TNL_v_TIL	ENSG00000130203	APOE	175.938	3.05256	0.830359	3.67619	0.000236743	0.0748968
NK-cell	TNL_v_TIL	ENSG00000143669	LYST	100.377	-0.99523	0.24752	-4.0208	5.80003e-05	0.150348
NK-cell	TNL_v_TIL	ENSG00000115457	IGFBP2	304.856	-1.83632	0.271307	-6.76844	1.30174e-11	1.68718e-07
NK-cell	TNL_v_TIL	ENSG00000163380	LMOD3	65.9962	1.27911	0.326066	3.92286	8.75041e-05	0.15506
NK-cell	TNL_v_TIL	ENSG00000198502	HLA-DRB5	17.0609	-3.05397	0.646113	-4.72668	2.28217e-06	0.00985973
NK-cell	TNL_v_TIL	ENSG00000223865	HLA-DPB1	107.604	-1.69159	0.33479	-5.05269	4.35638e-07	0.00282315
NK-cell	TNL_v_TIL	ENSG00000269900	RMRP	28.565	2.28728	0.582487	3.92675	8.61018e-05	0.15506
NK-cell	TNL_v_TIL	ENSG00000197728	RPS26	5248.26	-1.20578	0.282108	-4.27418	1.91844e-05	0.0621624
NK-cell	TNL_v_TIL	ENSG00000126803	HSPA2	77.2082	1.40518	0.36019	3.90122	9.57086e-05	0.15506
Stromal-1	TNL_v_TIL	ENSG00000120885	CLU	124.865	-3.48872	0.816397	-4.27332	1.92588e-05	0.160563
Stromal-1	TNL_v_TIL	ENSG00000187193	MT1X	928.239	-3.22284	0.768773	-4.19218	2.76285e-05	0.160563
Stromal-2	TNL_v_TIL	ENSG00000127472	PLA2G5	18.8484	-2.25158	0.688119	-3.27208	0.00106759	0.13247
Stromal-2	TNL_v_TIL	ENSG00000142871	CYR61	689.419	-1.17733	0.337327	-3.49018	0.000482704	0.0970442
Stromal-2	TNL_v_TIL	ENSG00000143384	MCL1	89.9636	-1.13999	0.366332	-3.1119	0.00185887	0.184092
Stromal-2	TNL_v_TIL	ENSG00000118194	TNNT2	35.9814	1.57481	0.508965	3.09415	0.00197378	0.190579
Stromal-2	TNL_v_TIL	ENSG00000143878	RHOB	123.976	-1.20777	0.360837	-3.34713	0.000816527	0.120741
Stromal-2	TNL_v_TIL	ENSG00000131386	GALNT15	14.4314	-2.50045	0.788738	-3.17019	0.00152339	0.161442
Stromal-2	TNL_v_TIL	ENSG00000144824	PHLDB2	12.2735	-2.01901	0.655543	-3.07991	0.00207064	0.195586
Stromal-2	TNL_v_TIL	ENSG00000163739	CXCL1	23.9638	-2.79929	0.688384	-4.06647	4.77306e-05	0.0253841
Stromal-2	TNL_v_TIL	ENSG00000145287	PLAC8	14.347	-3.62761	0.773583	-4.68935	2.74068e-06	0.00223655
Stromal-2	TNL_v_TIL	ENSG00000120738	EGR1	213.746	-1.28041	0.385807	-3.31879	0.000904073	0.122756
Stromal-2	TNL_v_TIL	ENSG00000172179	PRL	11.0938	-5.6405	1.61881	-3.48435	0.000493329	0.0970442
Stromal-2	TNL_v_TIL	ENSG00000137331	IER3	327.229	-1.36516	0.403445	-3.38375	0.000715022	0.118075
Stromal-2	TNL_v_TIL	ENSG00000080546	SESN1	90.4339	-1.41258	0.431299	-3.27517	0.00105597	0.13247
Stromal-2	TNL_v_TIL	ENSG00000112096	SOD2	138.26	-2.06911	0.443554	-4.66485	3.08845e-06	0.00223655
Stromal-2	TNL_v_TIL	ENSG00000178381	ZFAND2A	35.8381	-1.6731	0.495985	-3.37328	0.000742778	0.118075
Stromal-2	TNL_v_TIL	ENSG00000164543	STK17A	15.0307	-2.11394	0.656614	-3.21945	0.00128435	0.143603
Stromal-2	TNL_v_TIL	ENSG00000106366	SERPINE1	132.349	-1.43651	0.321908	-4.46248	8.10156e-06	0.00502875
Stromal-2	TNL_v_TIL	ENSG00000221869	CEBPD	516.284	-1.08391	0.309866	-3.49799	0.000468773	0.0970442
Stromal-2	TNL_v_TIL	ENSG00000147872	PLIN2	98.3587	-1.33768	0.375091	-3.56629	0.000362076	0.0970442
Stromal-2	TNL_v_TIL	ENSG00000119138	KLF9	13.185	-2.16029	0.63905	-3.38048	0.000723594	0.118075
Stromal-2	TNL_v_TIL	ENSG00000044574	HSPA5	167.934	-1.20774	0.3477	-3.47351	0.000513698	0.0970442
Stromal-2	TNL_v_TIL	ENSG00000107317	PTGDS	2088.55	1.43156	0.249915	5.72819	1.01508e-08	4.41053e-05
Stromal-2	TNL_v_TIL	ENSG00000067082	KLF6	200.442	-1.32399	0.408142	-3.24394	0.00117889	0.138439
Stromal-2	TNL_v_TIL	ENSG00000122862	SRGN	41.0013	-2.966	0.891675	-3.32632	0.000879994	0.122756
Stromal-2	TNL_v_TIL	ENSG00000173457	PPP1R14B	17.3719	-2.24173	0.661979	-3.3864	0.000708158	0.118075
Stromal-2	TNL_v_TIL	ENSG00000109906	ZBTB16	33.1746	-2.55254	0.509234	-5.01252	5.37221e-07	0.000778075
Stromal-2	TNL_v_TIL	ENSG00000149564	ESAM	11.9717	-4.22906	0.856788	-4.93595	7.9763e-07	0.000866426
Stromal-2	TNL_v_TIL	ENSG00000111796	KLRB1	25.9481	-3.79713	1.12787	-3.36664	0.000760898	0.118075
Stromal-2	TNL_v_TIL	ENSG00000173391	OLR1	28.9714	1.97979	0.600286	3.29807	0.000973522	0.12818
Stromal-2	TNL_v_TIL	ENSG00000111348	ARHGDIB	17.2073	-2.31386	0.64963	-3.56181	0.00036831	0.0970442
Stromal-2	TNL_v_TIL	ENSG00000175183	CSRP2	54.0208	1.54403	0.425933	3.62505	0.000288905	0.0896636
Stromal-2	TNL_v_TIL	ENSG00000133639	BTG1	244.626	-1.07174	0.285784	-3.75019	0.000176699	0.0639796
Stromal-2	TNL_v_TIL	ENSG00000235162	C12orf75	19.4811	-2.29503	0.655975	-3.49866	0.000467599	0.0970442
Stromal-2	TNL_v_TIL	ENSG00000102760	RGCC	58.8116	-3.93604	1.02427	-3.84279	0.000121645	0.0480497
Stromal-2	TNL_v_TIL	ENSG00000100906	NFKBIA	320.687	-1.76121	0.441223	-3.99166	6.5612e-05	0.0285084
Stromal-2	TNL_v_TIL	ENSG00000165949	IFI27	91.62	-2.48012	0.447282	-5.54488	2.94156e-08	6.39054e-05
Stromal-2	TNL_v_TIL	ENSG00000182809	CRIP2	19.2482	-2.02677	0.629741	-3.21843	0.00128896	0.143603
Stromal-2	TNL_v_TIL	ENSG00000161570	CCL5	13.2011	-2.44229	0.69075	-3.5357	0.000406694	0.0970442
Stromal-2	TNL_v_TIL	ENSG00000125845	BMP2	14.2707	-2.56427	0.72488	-3.53751	0.000403923	0.0970442
Stromal-2	TNL_v_TIL	ENSG00000101347	SAMHD1	19.394	-1.7249	0.528423	-3.26424	0.00109756	0.13247
Stromal-2	TNL_v_TIL	ENSG00000172216	CEBPB	198.888	-1.18573	0.354865	-3.34137	0.000833657	0.120741
Stromal-2	TNL_v_TIL	ENSG00000128016	ZFP36	423.563	-1.4826	0.366631	-4.04386	5.25792e-05	0.0253841
Stromal-2	TNL_v_TIL	ENSG00000125740	FOSB	203.164	-1.48781	0.466108	-3.19199	0.00141294	0.153481
Stromal-2	TNL_v_TIL	ENSG00000105374	NKG7	28.7915	-3.37204	1.07149	-3.14706	0.00164919	0.170613
Stromal-2	TNL_v_TIL	ENSG00000100219	XBP1	101.07	-1.03909	0.333998	-3.11105	0.00186422	0.184092
Stromal-2	TNL_v_TIL	ENSG00000185022	MAFF	32.5749	-2.06149	0.566684	-3.63781	0.000274962	0.0896636
T-cell-activated	TNL_v_TIL	ENSG00000150681	RGS18	6.81502	6.17075	1.34974	4.5718	4.83563e-06	0.0318499
T-cell-activated	TNL_v_TIL	ENSG00000163380	LMOD3	64.5564	1.33232	0.344029	3.87271	0.000107634	0.177233
T-cell-activated	TNL_v_TIL	ENSG00000163739	CXCL1	13.0747	-3.3304	0.858239	-3.8805	0.000104241	0.177233
T-cell-activated	TNL_v_TIL	ENSG00000081041	CXCL2	37.2894	-2.46864	0.571167	-4.32209	1.54555e-05	0.0508988
T-cell-activated	TNL_v_TIL	ENSG00000146678	IGFBP1	74.4547	-1.58511	0.397724	-3.98544	6.7354e-05	0.147876
T-cell-activated	TNL_v_TIL	ENSG00000134545	KLRC1	60.6929	-1.74919	0.421491	-4.15	3.32473e-05	0.0875934
T-cell-activated	TNL_v_TIL	ENSG00000197728	RPS26	5328.18	-1.10298	0.25392	-4.34381	1.4003e-05	0.0508988
T-cell-activated	TNL_v_TIL	ENSG00000165949	IFI27	148.572	-2.00126	0.366345	-5.46279	4.68715e-08	0.000617438
T-cell-resting	TNL_v_TIL	ENSG00000213240	NOTCH2NL	80.6559	-1.63655	0.361897	-4.52214	6.12176e-06	0.0416341
T-cell-resting	TNL_v_TIL	ENSG00000236213	AC006369.2	17.9236	-2.28082	0.565243	-4.03511	5.45768e-05	0.148471
T-cell-resting	TNL_v_TIL	ENSG00000163519	TRAT1	369.232	0.968306	0.204705	4.73024	2.24251e-06	0.0305027
T-cell-resting	TNL_v_TIL	ENSG00000164674	SYTL3	173.061	-0.968103	0.237438	-4.07729	4.55643e-05	0.148471
T-cell-resting	TNL_v_TIL	ENSG00000197728	RPS26	9318.7	-0.996608	0.231933	-4.29697	1.73152e-05	0.0785073
npiCTB	TIL_v_PTL	ENSG00000204389	HSPA1A	33.5007	1.90403	0.427033	4.45875	8.24385e-06	0.0267123
npiCTB	TIL_v_PTL	ENSG00000169583	CLIC3	130.612	-1.1567	0.262782	-4.40173	1.07394e-05	0.0267123
npiCTB	TIL_v_PTL	ENSG00000251562	MALAT1	338.201	2.09681	0.382677	5.47932	4.26959e-08	0.000318597
npiCTB	TIL_v_PTL	ENSG00000137474	MYO7A	4.53291	4.52061	1.17958	3.83239	0.000126905	0.189393
npiCTB	TIL_v_PTL	ENSG00000137714	FDX1	35.0586	-1.86789	0.482466	-3.87154	0.00010815	0.189393
CTB	TIL_v_PTL	ENSG00000188910	GJB3	7.93336	3.29352	0.923647	3.56577	0.000362783	0.142093
CTB	TIL_v_PTL	ENSG00000132681	ATP1A4	78.2246	6.47763	1.82527	3.54887	0.000386892	0.14784
CTB	TIL_v_PTL	ENSG00000116667	C1orf21	757.413	-1.35937	0.399058	-3.40645	0.000658141	0.194621
CTB	TIL_v_PTL	ENSG00000081237	PTPRC	23.2296	1.98049	0.501496	3.94917	7.84221e-05	0.04388
CTB	TIL_v_PTL	ENSG00000222030	AC007131.1	27.5663	2.02785	0.58722	3.45331	0.000553749	0.190518
CTB	TIL_v_PTL	ENSG00000158050	DUSP2	43.3507	1.77026	0.398608	4.4411	8.94998e-06	0.0100157
CTB	TIL_v_PTL	ENSG00000163453	IGFBP7	341.01	1.68747	0.438748	3.84611	0.000120008	0.0594365
CTB	TIL_v_PTL	ENSG00000156234	CXCL13	8.22711	7.52131	1.81827	4.13651	3.5263e-05	0.0241702
CTB	TIL_v_PTL	ENSG00000145287	PLAC8	213.734	-1.76796	0.427552	-4.13508	3.54831e-05	0.0241702
CTB	TIL_v_PTL	ENSG00000247345	RP11-266N13.2	9.47442	2.63576	0.734107	3.59043	0.000330139	0.133752
CTB	TIL_v_PTL	ENSG00000113369	ARRDC3	2410	-0.781688	0.205597	-3.80204	0.000143511	0.0681331
CTB	TIL_v_PTL	ENSG00000145824	CXCL14	77.2044	4.41703	1.23098	3.58821	0.00033295	0.133752
CTB	TIL_v_PTL	ENSG00000204642	HLA-F	14.7512	2.14524	0.625797	3.42801	0.000608023	0.190518
CTB	TIL_v_PTL	ENSG00000206503	HLA-A	271.001	1.56975	0.36221	4.33382	1.46545e-05	0.0143495
CTB	TIL_v_PTL	ENSG00000223865	HLA-DPB1	46.6375	1.56147	0.45531	3.42947	0.000604754	0.190518
CTB	TIL_v_PTL	ENSG00000111879	FAM184A	604.589	-0.966248	0.283661	-3.40635	0.000658383	0.194621
CTB	TIL_v_PTL	ENSG00000106304	SPAM1	14.5631	2.53505	0.599903	4.22577	2.38125e-05	0.0196353
CTB	TIL_v_PTL	ENSG00000147443	DOK2	23.1356	1.9811	0.46779	4.23501	2.2854e-05	0.0196353
CTB	TIL_v_PTL	ENSG00000008853	RHOBTB2	171.211	-1.19382	0.343738	-3.47305	0.000514582	0.187487
CTB	TIL_v_PTL	ENSG00000147649	MTDH	40.1502	1.35025	0.392102	3.44362	0.000573987	0.190518
CTB	TIL_v_PTL	ENSG00000244187	TMEM141	1274.01	-1.05764	0.28261	-3.74241	0.000182262	0.0839853
CTB	TIL_v_PTL	ENSG00000169583	CLIC3	7472.91	-0.894826	0.173873	-5.14643	2.65497e-07	0.00129877
CTB	TIL_v_PTL	ENSG00000107742	SPOCK2	11.6408	2.61323	0.669001	3.90617	9.37718e-05	0.0506594
CTB	TIL_v_PTL	ENSG00000070081	NUCB2	1669.58	-0.569326	0.136092	-4.18339	2.87189e-05	0.0214256
CTB	TIL_v_PTL	ENSG00000026508	CD44	145.695	1.75004	0.367948	4.75623	1.9724e-06	0.00343351
CTB	TIL_v_PTL	ENSG00000213402	PTPRCAP	39.1416	1.99418	0.464234	4.29563	1.74201e-05	0.0160541
CTB	TIL_v_PTL	ENSG00000165457	FOLR2	19.0095	2.24466	0.621135	3.61381	0.000301732	0.127763
CTB	TIL_v_PTL	ENSG00000137714	FDX1	3954.77	-1.18346	0.307929	-3.84328	0.0001214	0.0594365
CTB	TIL_v_PTL	ENSG00000167286	CD3D	24.6081	2.65934	0.633508	4.1978	2.69519e-05	0.0211128
CTB	TIL_v_PTL	ENSG00000118971	CCND2	132.305	2.68258	0.589499	4.5506	5.3492e-06	0.00761872
CTB	TIL_v_PTL	ENSG00000111796	KLRB1	83.7786	1.68516	0.347342	4.85159	1.22474e-06	0.00239849
CTB	TIL_v_PTL	ENSG00000110848	CD69	39.5696	1.63492	0.443288	3.68817	0.000225875	0.0999698
CTB	TIL_v_PTL	ENSG00000205420	KRT6A	19.8531	5.13945	1.01527	5.06218	4.14493e-07	0.00129877
CTB	TIL_v_PTL	ENSG00000122035	RASL11A	60.9874	1.89937	0.470944	4.0331	5.50456e-05	0.034496
CTB	TIL_v_PTL	ENSG00000261105	RP11-173B14.5	149.947	-1.26864	0.369461	-3.43377	0.000595248	0.190518
CTB	TIL_v_PTL	ENSG00000100450	GZMH	11.9942	2.64969	0.751369	3.52648	0.000421124	0.157089
CTB	TIL_v_PTL	ENSG00000021645	NRXN3	103.377	1.39466	0.353016	3.95069	7.79275e-05	0.04388
CTB	TIL_v_PTL	ENSG00000140284	SLC27A2	1673.38	1.33554	0.267019	5.00167	5.68358e-07	0.00148408
CTB	TIL_v_PTL	ENSG00000008517	IL32	78.2022	2.25862	0.482873	4.67746	2.90454e-06	0.00455054
CTB	TIL_v_PTL	ENSG00000198417	MT1F	73.8448	-1.58817	0.401813	-3.9525	7.73394e-05	0.04388
CTB	TIL_v_PTL	ENSG00000179776	CDH5	214.717	-2.2204	0.38883	-5.71046	1.12673e-08	0.000176525
CTB	TIL_v_PTL	ENSG00000103257	SLC7A5	614.419	-1.28415	0.313096	-4.10146	4.10547e-05	0.0268001
CTB	TIL_v_PTL	ENSG00000161570	CCL5	86.4444	1.7897	0.328056	5.45548	4.88403e-08	0.00038259
CTB	TIL_v_PTL	ENSG00000129277	CCL4	97.2042	1.36504	0.39398	3.46474	0.000530747	0.188982
CTB	TIL_v_PTL	ENSG00000267121	CTD-2020K17.1	10.6419	-4.22781	1.23313	-3.42851	0.000606893	0.190518
CTB	TIL_v_PTL	ENSG00000173762	CD7	36.7258	1.74902	0.397077	4.40473	1.05915e-05	0.0110625
CTB	TIL_v_PTL	ENSG00000077984	CST7	20.6759	2.04784	0.453483	4.5158	6.30787e-06	0.00763107
CTB	TIL_v_PTL	ENSG00000105137	SYDE1	168.889	-2.00937	0.445045	-4.51499	6.33203e-06	0.00763107
CTB	TIL_v_PTL	ENSG00000196109	ZNF676	11.2527	5.19973	1.05143	4.9454	7.59892e-07	0.00170075
CTB	TIL_v_PTL	ENSG00000126264	HCST	57.7577	1.32987	0.389945	3.4104	0.000648669	0.194621
CTB	TIL_v_PTL	ENSG00000105198	LGALS13	156.402	-2.11858	0.547548	-3.8692	0.000109192	0.0570238
CTB	TIL_v_PTL	ENSG00000197380	DACT3	263.734	-1.91621	0.37681	-5.08536	3.6693e-07	0.00129877
CTB	TIL_v_PTL	ENSG00000105374	NKG7	110.774	1.60876	0.436702	3.68388	0.000229713	0.0999698
Decidual	TIL_v_PTL	ENSG00000133216	EPHB2	19.359	1.901	0.490235	3.87772	0.00010544	0.144629
Decidual	TIL_v_PTL	ENSG00000158014	SLC30A2	9.12998	5.29193	1.16198	4.55422	5.25796e-06	0.0173092
Decidual	TIL_v_PTL	ENSG00000143140	GJA5	81.2705	1.93732	0.51975	3.7274	0.000193461	0.164489
Decidual	TIL_v_PTL	ENSG00000162817	C1orf115	95.7957	1.32752	0.345266	3.8449	0.000120601	0.14469
Decidual	TIL_v_PTL	ENSG00000184261	KCNK12	37.7197	2.37557	0.631083	3.76428	0.000167029	0.161723
Decidual	TIL_v_PTL	ENSG00000169605	GKN1	42.2746	5.23636	1.0239	5.11413	3.15182e-07	0.00518789
Decidual	TIL_v_PTL	ENSG00000115602	IL1RL1	3952.82	1.81852	0.481377	3.77775	0.000158249	0.161723
Decidual	TIL_v_PTL	ENSG00000135919	SERPINE2	6079.46	2.12376	0.505371	4.20238	2.64119e-05	0.0543426
Decidual	TIL_v_PTL	ENSG00000121858	TNFSF10	586.305	1.70104	0.449182	3.78698	0.00015249	0.161723
Decidual	TIL_v_PTL	ENSG00000174792	C4orf26	19.0017	2.4248	0.616954	3.93027	8.48496e-05	0.134294
Decidual	TIL_v_PTL	ENSG00000137270	GCM1	91.5294	2.22876	0.594949	3.74614	0.00017958	0.164216
Decidual	TIL_v_PTL	ENSG00000177791	MYOZ1	14.9392	3.57355	0.782788	4.56515	4.99134e-06	0.0173092
Decidual	TIL_v_PTL	ENSG00000135378	PRRG4	40.9132	1.56688	0.428779	3.65428	0.000257906	0.176881
Decidual	TIL_v_PTL	ENSG00000137496	IL18BP	45.0917	2.30435	0.557904	4.13037	3.62179e-05	0.0662384
Decidual	TIL_v_PTL	ENSG00000111348	ARHGDIB	235.417	1.50886	0.350625	4.30334	1.68239e-05	0.0395602
Decidual	TIL_v_PTL	ENSG00000139629	GALNT6	67.1789	1.74597	0.358516	4.86999	1.11604e-06	0.00918504
Decidual	TIL_v_PTL	ENSG00000102554	KLF5	156.506	0.827144	0.211181	3.91676	8.97472e-05	0.134294
Decidual	TIL_v_PTL	ENSG00000125384	PTGER2	30.8537	1.80532	0.485408	3.71919	0.000199865	0.164489
Decidual	TIL_v_PTL	ENSG00000140479	PCSK6	44.5828	1.57781	0.434558	3.63084	0.000282499	0.185997
Decidual	TIL_v_PTL	ENSG00000102886	GDPD3	90.9895	1.9863	0.449696	4.41698	1.0009e-05	0.0274581
Decidual	TIL_v_PTL	ENSG00000103546	SLC6A2	39.3315	1.97163	0.534282	3.69023	0.000224051	0.175613
Decidual	TIL_v_PTL	ENSG00000132205	EMILIN2	800.886	-0.698933	0.190356	-3.67172	0.000240922	0.176881
Decidual	TIL_v_PTL	ENSG00000053747	LAMA3	136.264	1.51172	0.393683	3.83994	0.000123065	0.14469
Decidual	TIL_v_PTL	ENSG00000046604	DSG2	50.9511	1.85991	0.398845	4.66323	3.1128e-06	0.0170789
Decidual	TIL_v_PTL	ENSG00000105143	SLC1A6	12.1891	3.76167	1.02657	3.66429	0.000248027	0.176881
Macrophage-1	TIL_v_PTL	ENSG00000164692	COL1A2	17.4895	2.66283	0.605326	4.399	1.08749e-05	0.0947284
Macrophage-1	TIL_v_PTL	ENSG00000130635	COL5A1	8.89554	3.61361	0.839163	4.30621	1.66074e-05	0.0947284
Macrophage-1	TIL_v_PTL	ENSG00000087245	MMP2	54.518	1.7544	0.412695	4.25108	2.12745e-05	0.0947284
EVT	TIL_v_PTL	ENSG00000228594	C1orf233	75.4202	0.945658	0.287521	3.28901	0.0010054	0.188126
EVT	TIL_v_PTL	ENSG00000158747	NBL1	28.2254	1.658	0.477772	3.47028	0.000519925	0.137346
EVT	TIL_v_PTL	ENSG00000158014	SLC30A2	228.792	2.37674	0.475174	5.00184	5.67872e-07	0.00122197
EVT	TIL_v_PTL	ENSG00000169442	CD52	73.7745	1.37461	0.41012	3.35174	0.000803056	0.159512
EVT	TIL_v_PTL	ENSG00000119535	CSF3R	96.3535	-1.72447	0.513413	-3.35884	0.000782695	0.159015
EVT	TIL_v_PTL	ENSG00000069702	TGFBR3	497.411	0.762914	0.235093	3.24516	0.00117385	0.195845
EVT	TIL_v_PTL	ENSG00000137948	BRDT	12.6238	2.09112	0.603517	3.46488	0.000530463	0.137346
EVT	TIL_v_PTL	ENSG00000116774	OLFML3	26.2175	2.0139	0.620471	3.24577	0.00117135	0.195845
EVT	TIL_v_PTL	ENSG00000163386	NBPF10	290.265	0.719296	0.200358	3.59006	0.000330601	0.112326
EVT	TIL_v_PTL	ENSG00000162706	CADM3	7.84426	5.61066	1.51068	3.71399	0.000204018	0.0752592
EVT	TIL_v_PTL	ENSG00000143196	DPT	340.094	1.78679	0.548828	3.25564	0.00113136	0.195845
EVT	TIL_v_PTL	ENSG00000090104	RGS1	82.502	1.61948	0.397075	4.07852	4.53226e-05	0.0278648
EVT	TIL_v_PTL	ENSG00000182118	FAM89A	206.279	-1.06715	0.315379	-3.3837	0.000715168	0.156501
EVT	TIL_v_PTL	ENSG00000169604	ANTXR1	632.435	1.79493	0.303827	5.90774	3.46833e-09	2.37692e-05
EVT	TIL_v_PTL	ENSG00000115525	ST3GAL5	447.401	1.45754	0.322358	4.52148	6.14082e-06	0.00528561
EVT	TIL_v_PTL	ENSG00000136732	GYPC	73.0177	2.01144	0.527664	3.81198	0.000137859	0.0582515
EVT	TIL_v_PTL	ENSG00000197635	DPP4	1083.98	-1.79674	0.425481	-4.22284	2.41246e-05	0.0155736
EVT	TIL_v_PTL	ENSG00000175040	CHST2	34.1002	1.4922	0.386541	3.86039	0.000113208	0.0522012
EVT	TIL_v_PTL	ENSG00000196549	MME	514.248	-1.43239	0.376114	-3.80841	0.000139865	0.0582515
EVT	TIL_v_PTL	ENSG00000145358	DDIT4L	9.41187	-3.49921	1.05474	-3.31762	0.00090788	0.17495
EVT	TIL_v_PTL	ENSG00000113269	RNF130	98.7453	-1.01909	0.286166	-3.56118	0.000369195	0.114568
EVT	TIL_v_PTL	ENSG00000206503	HLA-A	489.281	1.29081	0.226787	5.69173	1.25755e-08	4.05907e-05
EVT	TIL_v_PTL	ENSG00000168477	TNXB	38.2555	2.27977	0.661049	3.44872	0.000563251	0.142591
EVT	TIL_v_PTL	ENSG00000197261	C6orf141	32.5328	-2.52582	0.706792	-3.57363	0.000352062	0.113637
EVT	TIL_v_PTL	ENSG00000124749	COL21A1	115.421	-1.2966	0.377244	-3.43704	0.000588112	0.146021
EVT	TIL_v_PTL	ENSG00000135346	CGA	507.34	-2.1741	0.574616	-3.78356	0.000154602	0.0587077
EVT	TIL_v_PTL	ENSG00000135549	PKIB	176.028	-1.13221	0.254001	-4.45751	8.29162e-06	0.0062214
EVT	TIL_v_PTL	ENSG00000231426	RP5-899B16.1	585.465	-2.44862	0.534362	-4.58233	4.59813e-06	0.00456665
EVT	TIL_v_PTL	ENSG00000106624	AEBP1	34.894	1.62572	0.426541	3.8114	0.000138179	0.0582515
EVT	TIL_v_PTL	ENSG00000122679	RAMP3	6.80648	3.48315	1.07169	3.25016	0.0011534	0.195845
EVT	TIL_v_PTL	ENSG00000170775	GPR37	101.28	-1.20384	0.345532	-3.48403	0.000493919	0.13568
EVT	TIL_v_PTL	ENSG00000158516	CPA2	11.9338	5.32789	1.49714	3.5587	0.000372695	0.114568
EVT	TIL_v_PTL	ENSG00000104332	SFRP1	1714.88	-0.887222	0.273588	-3.24291	0.00118317	0.195845
EVT	TIL_v_PTL	ENSG00000164932	CTHRC1	73.1598	1.88159	0.534785	3.5184	0.000434153	0.122712
EVT	TIL_v_PTL	ENSG00000148200	NR6A1	36.3915	-1.89359	0.487855	-3.88146	0.000103833	0.0522012
EVT	TIL_v_PTL	ENSG00000185904	LINC00839	16.008	3.2455	0.837084	3.87715	0.000105686	0.0522012
EVT	TIL_v_PTL	ENSG00000107742	SPOCK2	20.9668	2.25239	0.689679	3.26586	0.00109134	0.194919
EVT	TIL_v_PTL	ENSG00000185201	IFITM2	314.182	1.45418	0.32694	4.44784	8.67362e-06	0.0062214
EVT	TIL_v_PTL	ENSG00000026508	CD44	132.65	1.19925	0.340589	3.52111	0.000429747	0.122712
EVT	TIL_v_PTL	ENSG00000186907	RTN4RL2	116.667	-1.5085	0.448635	-3.36243	0.000772606	0.159015
EVT	TIL_v_PTL	ENSG00000013725	CD6	10.067	2.28043	0.682736	3.34014	0.000837358	0.163805
EVT	TIL_v_PTL	ENSG00000167992	VWCE	538.521	-1.63944	0.507761	-3.22877	0.00124324	0.198166
EVT	TIL_v_PTL	ENSG00000256690	RP11-727F15.9	137.812	-1.42867	0.406271	-3.51654	0.000437206	0.122712
EVT	TIL_v_PTL	ENSG00000189253	TRIM64B	642.502	-1.92051	0.325627	-5.89788	3.68201e-09	2.37692e-05
EVT	TIL_v_PTL	ENSG00000166741	NNMT	183.304	1.65947	0.360169	4.60748	4.0757e-06	0.00456665
EVT	TIL_v_PTL	ENSG00000149573	MPZL2	13.8166	3.10463	0.908629	3.41683	0.000633556	0.147368
EVT	TIL_v_PTL	ENSG00000167286	CD3D	30.8307	2.35599	0.544357	4.32803	1.50448e-05	0.0102233
EVT	TIL_v_PTL	ENSG00000159403	C1R	89.2501	2.2459	0.566416	3.96511	7.33631e-05	0.0394663
EVT	TIL_v_PTL	ENSG00000127324	TSPAN8	32.636	1.52042	0.438901	3.46416	0.000531894	0.137346
EVT	TIL_v_PTL	ENSG00000179520	SLC17A8	83.8949	-3.3912	0.749475	-4.52476	6.04627e-06	0.00528561
EVT	TIL_v_PTL	ENSG00000123179	EBPL	134.16	1.75182	0.392655	4.46148	8.13966e-06	0.0062214
EVT	TIL_v_PTL	ENSG00000153495	TEX29	31.5379	4.57272	0.996996	4.5865	4.50747e-06	0.00456665
EVT	TIL_v_PTL	ENSG00000155465	SLC7A7	61.212	1.80826	0.384857	4.69852	2.62049e-06	0.00338332
EVT	TIL_v_PTL	ENSG00000187630	DHRS4L2	22.9135	3.21316	0.636891	5.04508	4.5334e-07	0.00117062
EVT	TIL_v_PTL	ENSG00000168952	STXBP6	19.6581	1.94348	0.488296	3.98013	6.88778e-05	0.0393928
EVT	TIL_v_PTL	ENSG00000186469	GNG2	18.8015	1.86967	0.530552	3.52401	0.000425073	0.122712
EVT	TIL_v_PTL	ENSG00000211448	DIO2	2376.25	-2.14779	0.591781	-3.62937	0.000284113	0.0991402
EVT	TIL_v_PTL	ENSG00000140105	WARS	143.088	1.33661	0.404486	3.30447	0.000951549	0.180668
EVT	TIL_v_PTL	ENSG00000137801	THBS1	123.036	1.94185	0.48843	3.97569	7.01754e-05	0.0393928
EVT	TIL_v_PTL	ENSG00000006327	TNFRSF12A	1111.93	-1.16853	0.345855	-3.37867	0.00072838	0.156735
EVT	TIL_v_PTL	ENSG00000008517	IL32	127.486	2.11383	0.365682	5.78052	7.44693e-09	3.20491e-05
EVT	TIL_v_PTL	ENSG00000267795	SMIM22	93.0928	-2.18378	0.453665	-4.81364	1.48209e-06	0.00273361
EVT	TIL_v_PTL	ENSG00000179776	CDH5	33.4842	-2.07127	0.546858	-3.78758	0.00015212	0.0587077
EVT	TIL_v_PTL	ENSG00000166482	MFAP4	71.4745	1.88415	0.514953	3.65889	0.000253314	0.0908484
EVT	TIL_v_PTL	ENSG00000161570	CCL5	143.343	1.00061	0.306647	3.26308	0.00110209	0.194919
EVT	TIL_v_PTL	ENSG00000161714	PLCD3	420.874	0.731533	0.213333	3.42906	0.000605678	0.147368
EVT	TIL_v_PTL	ENSG00000005882	PDK2	26.4972	1.67971	0.4983	3.37089	0.000749266	0.158587
EVT	TIL_v_PTL	ENSG00000108821	COL1A1	317.727	3.20587	0.979429	3.2732	0.00106336	0.193367
EVT	TIL_v_PTL	ENSG00000136487	GH2	43.6222	-2.54191	0.742816	-3.42199	0.000621651	0.147368
EVT	TIL_v_PTL	ENSG00000262094	AC139099.5	18.3575	-2.32122	0.680815	-3.40948	0.000650869	0.147427
EVT	TIL_v_PTL	ENSG00000077984	CST7	31.618	2.04912	0.530189	3.86489	0.000111141	0.0522012
EVT	TIL_v_PTL	ENSG00000101017	CD40	167.297	1.51064	0.443783	3.404	0.000664068	0.147824
EVT	TIL_v_PTL	ENSG00000101144	BMP7	137.051	-2.47078	0.518448	-4.76573	1.88171e-06	0.00303684
EVT	TIL_v_PTL	ENSG00000161249	DMKN	21.9714	2.78069	0.734544	3.7856	0.000153336	0.0587077
EVT	TIL_v_PTL	ENSG00000124466	LYPD3	365.799	-1.35036	0.418162	-3.22927	0.00124107	0.198166
EVT	TIL_v_PTL	ENSG00000178935	ZNF552	50.4182	-1.31275	0.400437	-3.27829	0.00104439	0.192631
EVT	TIL_v_PTL	ENSG00000100181	TPTEP1	293.375	-1.1761	0.363235	-3.23785	0.00120433	0.196824
EVT	TIL_v_PTL	ENSG00000234380	AP000330.8	8.91552	3.73435	1.0937	3.41441	0.000639192	0.147368
EVT	TIL_v_PTL	ENSG00000233818	AP000695.4	21.3908	1.56459	0.466084	3.35689	0.00078824	0.159015
EVT	TIL_v_PTL	ENSG00000160200	CBS	20.6172	2.2205	0.619976	3.58158	0.000341521	0.113061
EVT	TIL_v_PTL	ENSG00000142173	COL6A2	118.49	2.40698	0.507638	4.74153	2.12114e-06	0.00304289
Fibroblast	TIL_v_PTL	ENSG00000117525	F3	24.2508	1.72837	0.399694	4.32424	1.5306e-05	0.0569688
Fibroblast	TIL_v_PTL	ENSG00000106809	OGN	15.013	3.55203	0.861921	4.12106	3.77134e-05	0.105277
Fibroblast	TIL_v_PTL	ENSG00000011465	DCN	410.894	1.33234	0.255328	5.21813	1.80743e-07	0.00201818
Fibroblast	TIL_v_PTL	ENSG00000017427	IGF1	24.0545	2.2537	0.511004	4.41034	1.03209e-05	0.0569688
Stromal-1	TIL_v_PTL	ENSG00000197614	MFAP5	27.9344	4.39583	0.982717	4.47314	7.70805e-06	0.0895906
Stromal-2	TIL_v_PTL	ENSG00000116774	OLFML3	270.951	1.66671	0.344869	4.83289	1.34567e-06	0.00857997
Stromal-2	TIL_v_PTL	ENSG00000196154	S100A4	263.452	1.56744	0.380453	4.11993	3.78989e-05	0.161096
Stromal-2	TIL_v_PTL	ENSG00000125148	MT2A	469.735	-1.99006	0.381641	-5.21447	1.84347e-07	0.00235079
